# Supplementary material for: Reverse complementary matches simultaneously promote both back-splicing and exon-skipping
Source: Research Square preprint supplement (doi:10.21203/rs.3.rs-360287/v1), 2021-05-12
Supplement: Supplementary file 1 [file 1f47c09a74b5b402e7a0d819.xlsx]

## Sheet: Filtered circRNAs
Table S5. List of filtered circRNAs with BSJ reads in each sample.
circ_ID	Chr	Start	End	Strand	Gene	sort_1	sort_2	sort_3	whole_1	whole_2	whole_3
cel_circ_5	I	55890	56293	-	Y48G1C.5	0	0	0	2	2	0
cel_circ_12	I	128697	129333	+	mex-3	2	0	5	1	2	2
cel_circ_15	I	279730	280431	+	C53D5.3	6	5	2	1	1	1
cel_circ_17	I	283519	284538	+	marc-4	3	4	0	0	0	1
cel_circ_18	I	284309	285211	+	marc-4	35	28	59	12	22	16
cel_circ_20	I	285008	285638	+	marc-4	4	0	10	1	0	0
cel_circ_22	I	332611	332949	+	daf-25	6	4	7	2	14	3
cel_circ_29	I	389759	391803	-	R119.5	1	3	3	0	4	3
cel_circ_30	I	389759	391806	-	R119.5	1	0	1	0	1	2
cel_circ_31	I	417522	418097	-	Y50C1A.2	1	2	4	1	2	0
cel_circ_34	I	446708	451461	+	tol-1	0	2	2	0	3	0
cel_circ_36	I	450197	451461	+	tol-1	1	2	0	0	0	0
cel_circ_38	I	459569	460062	+	tol-1	5	1	6	3	7	2
cel_circ_42	I	491197	494706	+	haf-4	1	0	0	3	5	1
cel_circ_51	I	648712	652373	+	Y65B4A.2	0	0	0	0	4	0
cel_circ_52	I	668761	669569	-	Y18H1A.14	1	2	0	4	9	1
cel_circ_56	I	698053	698322	-	Y18H1A.2	0	5	4	5	6	2
cel_circ_59	I	749898	750845	-	Y18H1A.9	0	0	0	1	1	3
cel_circ_66	I	820264	824762	+	zfh-2	0	0	0	1	1	1
cel_circ_70	I	823093	824762	+	zfh-2	2	3	3	0	0	0
cel_circ_80	I	865731	866858	+	Y95B8A.8	4	1	1	2	2	2
cel_circ_82	I	878217	881201	-	pde-6	0	5	3	1	2	1
cel_circ_86	I	914002	916406	-	Y95B8A.12	6	2	5	1	1	1
cel_circ_89	I	915980	926914	-	Y95B8A.12	2	0	3	1	0	0
cel_circ_91	I	952677	953092	-	mig-1	6	5	6	8	15	9
cel_circ_93	I	971460	971950	-	shc-1	2	6	2	8	16	10
cel_circ_94	I	971460	972003	-	shc-1	0	0	1	1	3	0
cel_circ_97	I	1007011	1007271	+	C54G6.2	2	5	3	0	1	2
cel_circ_100	I	1051916	1052854	-	Y34D9A.8	1	2	0	1	0	0
cel_circ_102	I	1071470	1071933	+	gsa-1	4	5	6	0	4	1
cel_circ_105	I	1077420	1086204	+	R06A10.1	1	1	1	1	0	1
cel_circ_112	I	1140803	1147585	-	Y48G8AL.10	1	0	0	0	3	1
cel_circ_114	I	1162617	1163104	+	Y48G8AL.7	3	0	0	0	0	0
cel_circ_122	I	1212574	1222827	+	herc-1	2	2	8	0	3	3
cel_circ_123	I	1221047	1222827	+	herc-1	0	1	4	2	3	5
cel_circ_128	I	1247363	1247590	+	herc-1	1	1	0	1	1	1
cel_circ_133	I	1267580	1268155	-	grh-1	0	0	0	2	1	0
cel_circ_135	I	1356082	1356371	+	Y92H12BL.1	1	0	3	1	0	0
cel_circ_142	I	1420211	1421308	+	Y92H12BR.3	14	6	13	10	8	11
cel_circ_143	I	1427228	1433717	-	Y92H12BR.4	0	2	1	0	4	0
cel_circ_149	I	1483083	1485059	+	dyb-1	1	2	5	1	5	1
cel_circ_151	I	1483083	1487410	+	dyb-1	1	0	1	1	1	1
cel_circ_152	I	1484719	1485059	+	dyb-1	0	3	1	0	2	0
cel_circ_157	I	1500702	1501243	+	not_annotated	7	6	1	3	4	0
cel_circ_164	I	1524298	1524643	+	Y92H12A.4	18	6	16	11	8	11
cel_circ_168	I	1550351	1552848	+	Y92H12A.2	7	4	6	9	21	11
cel_circ_169	I	1550351	1553951	+	Y92H12A.2	2	2	0	0	0	0
cel_circ_173	I	1566931	1570681	+	src-1	0	0	0	0	2	1
cel_circ_174	I	1574143	1574491	+	src-1	1	1	1	0	0	1
cel_circ_175	I	1577387	1577868	+	src-1	2	0	1	0	1	0
cel_circ_176	I	1584284	1586339	+	Y73E7A.3	6	0	5	2	0	0
cel_circ_179	I	1595902	1596204	-	cpx-1	7	8	2	0	2	0
cel_circ_183	I	1623182	1625003	-	bre-4	1	2	3	0	1	0
cel_circ_187	I	1670969	1671255	-	Y71G12B.23	1	0	4	1	3	0
cel_circ_188	I	1674941	1675386	-	Y71G12B.35	21	19	19	4	14	12
cel_circ_189	I	1725047	1725438	+	tln-1	0	0	3	0	0	1
cel_circ_196	I	1763589	1764896	+	lin-65	1	1	2	1	0	0
cel_circ_199	I	1793254	1795453	+	Y71G12B.6	0	0	2	1	3	1
cel_circ_200	I	1809574	1809646	+	pghm-1	0	0	2	1	2	0
cel_circ_201	I	1811062	1811665	+	pghm-1	16	11	12	4	0	0
cel_circ_202	I	1817301	1817612	+	Y71G12B.2	5	2	5	12	36	9
cel_circ_204	I	1838159	1839380	+	egl-30	0	1	3	0	1	0
cel_circ_209	I	1876518	1877723	+	tub-2	4	2	6	3	2	0
cel_circ_214	I	1929521	1929876	+	hex-4	2	1	0	0	1	1
cel_circ_217	I	1969756	1970224	+	Y51F10.3	0	1	2	1	0	0
cel_circ_220	I	1999953	2001193	-	gap-3	1	2	4	3	0	2
cel_circ_228	I	2035684	2036009	-	Y20F4.4	81	73	87	59	79	40
cel_circ_230	I	2040539	2042738	-	Y20F4.4	0	2	2	0	4	0
cel_circ_233	I	2066704	2067238	+	arl-13	29	35	31	3	13	8
cel_circ_236	I	2078961	2079994	+	Y37E3.11	0	1	1	0	3	0
cel_circ_237	I	2082814	2084550	+	Y37E3.11	2	1	0	0	0	1
cel_circ_239	I	2090423	2092500	-	iglr-3	43	41	36	4	11	5
cel_circ_242	I	2147148	2147589	+	not_annotated	0	3	5	0	5	2
cel_circ_246	I	2173754	2174984	+	afd-1	1	4	1	3	2	4
cel_circ_255	I	2220559	2222565	-	W03F11.1	1	2	0	0	0	0
cel_circ_263	I	2286070	2286338	-	cdk-7	3	0	0	0	0	0
cel_circ_267	I	2328934	2329391	+	srbc-64	0	0	0	0	0	4
cel_circ_268	I	2361566	2364686	+	nekl-1	2	0	3	0	0	0
cel_circ_269	I	2361566	2365214	+	nekl-1	11	6	2	1	1	0
cel_circ_271	I	2363509	2364686	+	nekl-1	2	2	7	1	0	0
cel_circ_278	I	2388157	2392708	-	dot-1.1	3	0	1	2	0	0
cel_circ_283	I	2415842	2417574	+	F23C8.13	5	16	10	3	4	2
cel_circ_288	I	2454658	2456463	-	inx-19	2	2	2	1	0	0
cel_circ_291	I	2478228	2478800	-	abtm-1	8	8	10	9	17	15
cel_circ_296	I	2611371	2612095	+	ctn-1	1	0	4	2	2	0
cel_circ_300	I	2668793	2669211	+	F32B5.6	1	0	1	0	1	4
cel_circ_302	I	2674219	2674886	-	F32B5.7	1	0	2	0	0	0
cel_circ_305	I	2711121	2712548	+	lin-17	5	7	3	4	5	0
cel_circ_307	I	2803997	2808444	+	itx-1	0	0	0	0	0	3
cel_circ_314	I	2936560	2936881	+	cogc-3	0	1	3	0	0	2
cel_circ_320	I	3017898	3018599	+	Y54E10BR.4	2	1	1	1	0	0
cel_circ_332	I	3253863	3254447	+	cogc-1	2	3	3	0	4	6
cel_circ_335	I	3381859	3384007	-	W05F2.4	0	4	2	2	10	1
cel_circ_336	I	3387680	3402864	-	W05F2.4	0	0	0	1	2	1
cel_circ_337	I	3394670	3397572	-	W05F2.4	1	1	1	4	4	1
cel_circ_338	I	3394670	3399020	-	W05F2.4	0	1	0	4	1	0
cel_circ_339	I	3394670	3400372	-	W05F2.4	1	0	0	1	1	2
cel_circ_340	I	3394670	3402864	-	W05F2.4	0	0	0	2	5	1
cel_circ_356	I	3598615	3598974	-	Y47G6A.29	1	2	1	0	4	0
cel_circ_357	I	3598620	3598974	-	Y47G6A.29	29	20	24	20	33	15
cel_circ_363	I	3646133	3647075	-	ccb-1	4	2	5	0	2	1
cel_circ_370	I	3753089	3753958	-	inx-13	0	0	0	0	3	1
cel_circ_384	I	4010774	4011585	-	unc-73	5	7	10	2	4	3
cel_circ_389	I	4047965	4054541	+	unc-89	0	0	1	3	1	0
cel_circ_390	I	4052456	4052939	+	unc-89	0	0	1	0	2	1
cel_circ_391	I	4055391	4057244	+	unc-89	31	44	40	110	140	75
cel_circ_397	I	4056204	4056308	+	unc-89	0	0	1	2	1	0
cel_circ_400	I	4081936	4085225	+	unc-89	1	0	0	0	3	1
cel_circ_403	I	4231143	4232676	+	nab-1	6	1	3	12	14	10
cel_circ_404	I	4231143	4232703	+	nab-1	14	8	13	43	91	47
cel_circ_406	I	4232496	4233617	+	nab-1	0	1	2	0	0	0
cel_circ_419	I	4416171	4418591	+	tiam-1	0	0	0	0	3	0
cel_circ_420	I	4417073	4418591	+	tiam-1	0	3	6	11	12	9
cel_circ_435	I	4557655	4562110	+	D1007.15	2	0	3	0	0	0
cel_circ_438	I	4605655	4607124	+	C44E4.5	2	2	2	4	7	2
cel_circ_442	I	4655721	4656780	+	ain-2	0	3	0	0	0	0
cel_circ_449	I	4696895	4697062	-	chd-7	0	3	0	0	0	0
cel_circ_456	I	4864609	4867825	-	rga-6	1	6	7	0	0	0
cel_circ_457	I	4866924	4867825	-	rga-6	3	1	2	0	0	0
cel_circ_462	I	4934259	4940975	+	dip-2	1	0	2	0	0	1
cel_circ_463	I	4938200	4940975	+	dip-2	7	1	1	3	3	2
cel_circ_467	I	4992538	4993506	-	dyf-1	6	9	4	0	2	2
cel_circ_471	I	5061357	5061998	-	fhod-1	1	1	0	1	2	2
cel_circ_474	I	5116013	5117088	-	elpc-1	0	3	2	0	3	4
cel_circ_495	I	5373982	5375191	-	pqn-44	5	4	3	0	2	0
cel_circ_503	I	5425162	5426197	-	F27C1.6	0	1	0	1	2	0
cel_circ_509	I	5546120	5546715	+	tom-1	0	0	0	3	0	0
cel_circ_511	I	5550822	5555178	+	tom-1	1	2	1	1	0	0
cel_circ_514	I	5551940	5557782	+	tom-1	1	1	4	0	2	1
cel_circ_515	I	5552880	5557782	+	tom-1	2	3	1	1	0	0
cel_circ_517	I	5559329	5560373	+	tom-1	3	0	0	0	0	0
cel_circ_519	I	5591551	5593780	-	tag-163	0	0	0	1	2	2
cel_circ_524	I	5601808	5603490	-	tag-83	2	1	1	1	0	3
cel_circ_526	I	5629908	5634235	+	F46F11.1	0	0	0	1	2	0
cel_circ_527	I	5631646	5634594	+	F46F11.1	5	9	3	0	0	0
cel_circ_529	I	5634403	5635399	+	F46F11.1	0	0	3	0	0	0
cel_circ_532	I	5681876	5685211	-	unc-40	0	0	0	1	2	1
cel_circ_535	I	5716728	5722004	+	lim-7	8	10	10	0	1	2
cel_circ_540	I	5820725	5821115	-	nhr-2	0	0	0	0	0	3
cel_circ_543	I	5889037	5892632	+	pgp-2	0	1	2	1	2	0
cel_circ_545	I	5906664	5907405	+	hpo-27	1	2	0	0	0	0
cel_circ_557	I	5998578	6000886	-	unc-94	2	0	1	3	2	0
cel_circ_562	I	6074036	6076173	-	ZK484.4	3	3	1	0	1	2
cel_circ_566	I	6180104	6180840	-	T09B4.9	0	0	3	0	0	0
cel_circ_574	I	6377543	6378704	+	gld-2	14	11	13	25	26	18
cel_circ_596	I	6667944	6668588	-	ZC581.9	0	0	0	0	3	0
cel_circ_604	I	6777315	6778574	-	pqn-21	0	0	0	0	3	0
cel_circ_609	I	6805409	6805669	-	K02F2.5	0	0	6	0	0	0
cel_circ_618	I	6944373	6945358	-	T10B11.6	0	2	0	0	3	0
cel_circ_624	I	7045068	7045775	+	sem-4	0	0	3	0	0	0
cel_circ_625	I	7050022	7051792	-	W01A8.7	0	0	3	0	0	0
cel_circ_647	I	7343919	7345093	+	glb-18	3	2	1	0	0	0
cel_circ_654	I	7363084	7364412	-	sue-1	3	1	6	3	0	0
cel_circ_655	I	7363084	7367769	-	sue-1	0	0	3	0	0	0
cel_circ_660	I	7422668	7425803	+	unc-13	1	1	4	0	0	0
cel_circ_663	I	7424934	7425803	+	unc-13	6	4	8	1	5	2
cel_circ_673	I	7452889	7453376	+	unc-13	1	2	0	0	0	0
cel_circ_683	I	7528869	7531004	+	nas-36	0	2	2	0	0	0
cel_circ_686	I	7598296	7601387	+	wdr-23	0	0	0	2	0	1
cel_circ_714	I	8037888	8039181	-	ath-1	0	0	3	0	0	0
cel_circ_724	I	8174879	8176868	+	kcnl-2	2	1	2	0	0	0
cel_circ_726	I	8176377	8176868	+	kcnl-2	4	1	4	0	1	1
cel_circ_728	I	8190464	8196622	+	kcnl-2	4	0	1	0	0	2
cel_circ_729	I	8190464	8199955	+	kcnl-2	1	1	1	0	0	1
cel_circ_741	I	8299499	8299863	-	abts-1	17	16	29	3	10	6
cel_circ_743	I	8303643	8307566	-	abts-1	0	1	0	0	3	0
cel_circ_748	I	8388028	8390027	-	T19A6.1	0	1	5	5	5	0
cel_circ_751	I	8420954	8422259	+	sin-3	3	7	3	10	7	3
cel_circ_755	I	8504820	8505351	+	linc-113	0	2	2	3	1	2
cel_circ_761	I	8563611	8567140	-	gon-2	0	0	1	3	1	0
cel_circ_765	I	8649761	8650021	+	sig-7	1	0	2	0	0	0
cel_circ_771	I	8781964	8782353	-	mfb-1	1	1	0	2	2	0
cel_circ_774	I	8817608	8820377	+	F36A2.9	20	18	20	3	4	4
cel_circ_777	I	8860364	8861272	-	ztf-26	2	0	1	0	0	0
cel_circ_784	I	9006392	9008708	-	fcp-1	0	1	0	3	0	0
cel_circ_785	I	9007809	9008708	-	fcp-1	3	0	0	0	0	0
cel_circ_788	I	9031513	9033852	-	acr-19	2	0	1	0	0	0
cel_circ_790	I	9072455	9073395	-	rsbp-1	3	2	4	0	0	1
cel_circ_793	I	9101838	9105024	-	gei-17	3	2	2	0	3	2
cel_circ_798	I	9104049	9106060	-	gei-17	2	3	2	0	2	1
cel_circ_803	I	9191557	9195124	-	lim-9	4	3	7	0	1	0
cel_circ_804	I	9191557	9205732	-	lim-9	1	2	2	1	0	0
cel_circ_806	I	9194413	9205732	-	lim-9	0	0	1	0	0	3
cel_circ_817	I	9441941	9442279	-	mec-8	1	1	2	0	12	4
cel_circ_821	I	9548228	9548663	+	swah-1	1	0	1	2	2	0
cel_circ_822	I	9554458	9554904	+	swah-1	3	1	1	4	3	0
cel_circ_825	I	9572150	9572595	-	rig-5	0	3	0	0	0	0
cel_circ_842	I	9998962	9999928	-	cfi-1	1	1	2	1	0	1
cel_circ_864	I	10266812	10268890	-	ZC247.1	1	0	3	3	0	0
cel_circ_866	I	10266812	10271200	-	ZC247.1	2	0	4	1	1	1
cel_circ_874	I	10388008	10388830	-	mgl-2	6	12	3	3	3	0
cel_circ_875	I	10388476	10388830	-	mgl-2	3	0	0	0	0	0
cel_circ_881	I	10510615	10511665	+	F59C6.8	0	1	2	0	0	0
cel_circ_885	I	10668636	10669276	+	fkb-7	1	3	0	0	1	0
cel_circ_886	I	10750572	10751188	+	daf-16	1	2	0	0	0	0
cel_circ_893	I	10804715	10805444	+	marc-6	6	7	9	6	2	4
cel_circ_898	I	10859681	10860619	+	Y37F4.1	4	0	3	0	0	0
cel_circ_899	I	10860247	10860619	+	Y37F4.1	2	1	4	0	0	0
cel_circ_904	I	10977650	10978056	+	Y52B11A.3	39	40	56	15	25	13
cel_circ_907	I	10980304	10982551	-	Y52B11A.4	0	4	1	0	0	0
cel_circ_911	I	10981007	10982551	-	Y52B11A.4	6	9	12	2	1	0
cel_circ_913	I	10981007	10990627	-	Y52B11A.4	3	7	2	0	0	0
cel_circ_915	I	10981276	10982551	-	Y52B11A.4	2	0	1	0	1	1
cel_circ_917	I	10981491	10982551	-	Y52B11A.4	11	11	11	2	5	2
cel_circ_918	I	10985001	10990627	-	Y52B11A.4	0	1	0	0	5	0
cel_circ_921	I	11048523	11049374	+	Y52B11A.10	1	1	2	1	1	2
cel_circ_922	I	11048523	11050126	+	Y52B11A.10	1	0	0	0	4	2
cel_circ_927	I	11086726	11088545	+	not_annotated	0	0	3	0	0	0
cel_circ_929	I	11094103	11094332	-	hmr-1	0	3	1	4	6	0
cel_circ_934	I	11127806	11130331	-	hmr-1	0	0	1	0	3	1
cel_circ_940	I	11217893	11219251	-	rsy-1	26	25	30	18	39	13
cel_circ_941	I	11224836	11225277	+	nfya-2	0	0	2	0	1	2
cel_circ_947	I	11247543	11249102	+	F46A8.11	5	15	6	0	0	0
cel_circ_948	I	11248156	11249102	+	F46A8.11	1	0	4	0	1	0
cel_circ_950	I	11275557	11275755	-	F36D1.9	6	0	0	1	1	2
cel_circ_959	I	11326693	11327727	+	cdk-9	2	2	3	3	2	1
cel_circ_960	I	11326693	11328873	+	cdk-9	2	1	4	4	1	2
cel_circ_961	I	11326693	11331649	+	cdk-9	0	0	0	0	3	0
cel_circ_962	I	11327452	11328873	+	cdk-9	0	1	2	2	6	2
cel_circ_969	I	11374622	11375270	+	F56G4.4	0	0	1	0	3	2
cel_circ_970	I	11376427	11376695	+	F56G4.4	2	1	3	0	4	1
cel_circ_971	I	11384085	11384364	+	png-1	17	23	26	17	19	10
cel_circ_974	I	11396254	11396660	-	aat-9	0	0	0	1	0	2
cel_circ_975	I	11402609	11403020	-	ego-2	1	2	0	0	2	1
cel_circ_979	I	11450569	11450969	+	not_annotated	1	3	2	0	0	0
cel_circ_980	I	11470465	11470865	-	not_annotated	1	1	1	0	0	0
cel_circ_993	I	11574158	11575702	-	F15D3.6	2	0	3	14	8	5
cel_circ_995	I	11584270	11584682	-	spe-9	1	1	2	1	2	0
cel_circ_996	I	11584285	11584694	+	not_annotated	0	3	4	1	1	1
cel_circ_998	I	11593920	11594304	+	unc-75	3	0	0	0	0	0
cel_circ_999	I	11593927	11594304	+	unc-75	41	23	31	6	6	6
cel_circ_1003	I	11598128	11598512	+	unc-75	1	2	1	0	0	0
cel_circ_1006	I	11612993	11615178	+	dhhc-7	0	0	0	2	1	0
cel_circ_1008	I	11617111	11619297	-	C17D12.3	0	0	2	1	7	5
cel_circ_1009	I	11617642	11619297	-	C17D12.3	0	1	3	8	26	13
cel_circ_1011	I	11618905	11619297	-	C17D12.3	0	5	10	5	18	5
cel_circ_1012	I	11621585	11621799	-	C17D12.9	2	1	2	1	3	0
cel_circ_1013	I	11624081	11624473	+	Y47H9A.1	0	1	3	1	2	2
cel_circ_1014	I	11624081	11625736	+	Y47H9A.1	0	0	1	8	16	11
cel_circ_1015	I	11624081	11626267	+	Y47H9A.1	0	0	0	1	11	1
cel_circ_1021	I	11677840	11678240	+	kpc-1	5	1	6	1	6	4
cel_circ_1029	I	11847044	11847896	+	dhhc-2	1	2	2	0	0	0
cel_circ_1032	I	11884098	11884456	+	dnj-27	0	1	5	0	3	1
cel_circ_1033	I	11920147	11920608	-	fdps-1	0	2	6	0	2	0
cel_circ_1034	I	11928718	11929509	-	wve-1	9	10	15	8	15	12
cel_circ_1035	I	11950145	11950899	+	R06C1.6	8	10	5	0	0	1
cel_circ_1036	I	11998781	12000232	+	Y53C10A.5	10	1	18	8	7	11
cel_circ_1037	I	11999025	11999831	+	Y53C10A.5	2	5	2	2	2	1
cel_circ_1038	I	11999733	12000232	+	Y53C10A.5	0	3	1	0	2	1
cel_circ_1040	I	12043392	12043487	+	F58D5.11	1	2	1	1	1	0
cel_circ_1051	I	12213940	12214274	+	C15C6.4	3	2	0	0	0	0
cel_circ_1057	I	12494826	12495869	+	T27F6.7	0	2	4	1	3	0
cel_circ_1063	I	12569518	12570084	-	dlk-1	5	5	3	3	3	3
cel_circ_1065	I	12669380	12670385	+	par-6	0	2	1	0	1	1
cel_circ_1066	I	12672357	12672788	+	par-6	1	1	2	0	1	2
cel_circ_1069	I	12741588	12742784	+	uba-2	0	2	1	0	0	2
cel_circ_1070	I	12742414	12743678	+	uba-2	13	10	11	4	3	6
cel_circ_1072	I	12762138	12762817	-	amx-2	3	4	4	14	24	7
cel_circ_1073	I	12762138	12763260	-	amx-2	2	0	1	4	1	3
cel_circ_1076	I	12828402	12829041	+	nhx-8	4	1	5	4	1	1
cel_circ_1078	I	12859497	12860749	+	clec-104	4	0	1	0	0	0
cel_circ_1081	I	12878639	12879593	+	pad-1	2	1	1	0	1	0
cel_circ_1083	I	12880648	12881527	+	pad-1	0	0	1	1	3	1
cel_circ_1094	I	12975185	12975635	+	gale-1	0	3	0	0	1	0
cel_circ_1100	I	12997957	12999568	+	smu-1	4	1	1	0	0	0
cel_circ_1103	I	13000535	13001567	+	smu-1	5	7	4	1	4	0
cel_circ_1105	I	13013377	13013945	+	pmr-1	11	4	2	0	7	0
cel_circ_1108	I	13015161	13015734	+	pmr-1	2	2	3	0	0	1
cel_circ_1111	I	13021486	13022628	+	pmr-1	4	2	4	0	1	1
cel_circ_1120	I	13058976	13059625	-	nhr-85	0	0	0	1	2	0
cel_circ_1140	I	13366661	13366886	-	sptf-3	9	12	15	9	11	6
cel_circ_1143	I	13417234	13417740	+	not_annotated	0	0	3	0	0	0
cel_circ_1146	I	13421433	13422280	+	W05H12.1	1	1	2	1	2	0
cel_circ_1162	I	13573956	13574641	+	Y87G2A.7	4	14	9	2	9	4
cel_circ_1167	I	13608910	13609355	-	agef-1	2	0	1	1	0	0
cel_circ_1173	I	13631483	13632210	+	unc-59	0	0	0	0	1	2
cel_circ_1176	I	13656180	13656559	+	W09C5.7	0	1	0	0	3	0
cel_circ_1178	I	13685198	13685687	-	W04A4.6	1	2	1	0	0	0
cel_circ_1181	I	13762134	13762461	+	Y6B3B.4	1	1	2	0	0	2
cel_circ_1185	I	13776989	13777304	+	Y37H9A.1	9	13	17	13	20	14
cel_circ_1187	I	13784402	13784625	+	Y37H9A.3	7	0	8	9	8	1
cel_circ_1193	I	13808771	13810560	-	maea-1	1	0	0	0	2	1
cel_circ_1194	I	13810194	13810560	-	maea-1	1	2	0	0	5	0
cel_circ_1196	I	13819671	13820358	-	W09G3.6	0	2	0	1	0	2
cel_circ_1198	I	13831739	13832146	-	W09G3.1	3	0	5	1	3	1
cel_circ_1210	I	13944650	13946404	-	usp-3	6	7	2	5	14	3
cel_circ_1211	I	13945460	13946404	-	usp-3	0	0	4	0	0	0
cel_circ_1216	I	14065259	14065754	-	F47G4.4	1	1	3	1	2	0
cel_circ_1217	I	14066289	14066546	-	F47G4.4	5	8	4	5	1	2
cel_circ_1220	I	14109232	14109445	-	dnj-29	2	1	0	1	0	1
cel_circ_1227	I	14189417	14189715	-	gopc-1	0	0	3	0	0	0
cel_circ_1229	I	14219756	14220178	-	best-11	0	0	3	1	0	0
cel_circ_1230	I	14224962	14225317	-	eya-1	4	0	0	0	0	0
cel_circ_1231	I	14224962	14227222	-	eya-1	2	1	0	0	0	2
cel_circ_1232	I	14226988	14231500	-	eya-1	0	3	0	0	0	0
cel_circ_1235	I	14322237	14322702	+	src-2	0	5	1	4	4	2
cel_circ_1245	I	14372324	14372909	-	bbs-1	16	10	14	3	7	2
cel_circ_1248	I	14407342	14409777	+	apg-1	0	0	5	1	1	0
cel_circ_1249	I	14407342	14413850	+	apg-1	0	0	3	0	1	0
cel_circ_1250	I	14409517	14409777	+	apg-1	1	2	1	0	3	1
cel_circ_1255	I	14426379	14426832	+	hpo-13	3	3	3	0	3	0
cel_circ_1257	I	14427069	14429010	+	hpo-13	4	2	6	4	3	2
cel_circ_1260	I	14487807	14489835	-	Y105E8A.20	0	0	1	1	1	2
cel_circ_1261	I	14492498	14492903	-	Y105E8A.20	0	1	0	2	2	1
cel_circ_1263	I	14508375	14510552	-	Y105E8A.21	1	3	0	0	1	0
cel_circ_1269	I	14585522	14587139	-	Y105E8A.29	1	0	0	1	1	2
cel_circ_1272	I	14595998	14596350	-	Y105E8A.25	0	2	1	0	0	0
cel_circ_1278	I	14622828	14624420	-	lev-11	2	1	6	3	0	0
cel_circ_1279	I	14622828	14625089	-	lev-11	0	0	0	4	5	1
cel_circ_1280	I	14624303	14624661	-	lev-11	2	9	4	6	13	2
cel_circ_1283	I	14636286	14637497	-	exoc-8	3	2	2	0	1	0
cel_circ_1285	I	14691257	14691734	-	ttm-5	0	0	1	0	0	3
cel_circ_1286	I	14712635	14713789	+	Y54E5A.7	12	7	10	3	7	4
cel_circ_1290	I	14724024	14724739	-	sol-2	6	8	8	0	3	0
cel_circ_1292	I	14728925	14729564	-	K05C4.9	0	1	3	0	0	0
cel_circ_1295	I	14762555	14764193	-	F39B2.8	2	0	3	0	0	1
cel_circ_1301	I	14848071	14848454	+	F32A7.5	0	4	5	6	9	5
cel_circ_1313	I	14870967	14871385	+	F11C3.1	0	1	0	0	3	1
cel_circ_1322	I	14940901	14943715	+	kin-1	0	0	3	1	0	0
cel_circ_1325	I	14948996	14949278	+	kin-1	2	4	1	0	0	1
cel_circ_1327	I	14961503	14961923	+	ces-2	3	0	1	0	3	2
cel_circ_1330	I	14977777	14978368	+	ZK337.2	3	0	0	0	0	0
cel_circ_1338	II	25487	28280	-	F23F1.4	0	0	0	1	1	1
cel_circ_1344	II	74290	74882	-	C23H3.9	0	2	1	0	1	0
cel_circ_1351	II	166753	169716	+	etr-1	2	1	0	0	0	0
cel_circ_1353	II	167904	169716	+	etr-1	3	0	0	0	0	0
cel_circ_1355	II	218299	219503	-	ubxn-3	2	1	1	1	2	0
cel_circ_1357	II	223704	232029	-	Y43H11AL.1	0	2	4	1	0	1
cel_circ_1359	II	229087	232029	-	Y43H11AL.1	2	5	4	1	4	0
cel_circ_1360	II	235462	235995	-	laat-1	1	0	0	4	1	0
cel_circ_1368	II	397452	398313	-	C03H5.6	6	21	22	10	10	2
cel_circ_1369	II	397452	399421	-	C03H5.6	0	1	3	0	0	0
cel_circ_1370	II	398600	399421	-	C03H5.6	0	5	0	0	0	0
cel_circ_1372	II	457582	457884	-	W10D9.6	5	1	7	5	2	4
cel_circ_1380	II	560031	560305	+	C09E8.1	2	0	3	2	2	3
cel_circ_1381	II	560636	561091	-	anr-27	0	1	1	1	0	4
cel_circ_1382	II	595778	596989	-	nhl-3	4	2	3	1	9	2
cel_circ_1383	II	599911	601205	-	nhl-3	0	0	0	1	4	1
cel_circ_1384	II	600451	601205	-	nhl-3	0	0	2	0	0	3
cel_circ_1385	II	619484	619830	-	T04B8.5	2	4	4	2	3	4
cel_circ_1386	II	619484	620974	-	T04B8.5	4	1	0	1	0	0
cel_circ_1388	II	638214	638636	-	K07E8.6	0	2	2	5	8	2
cel_circ_1390	II	709751	710198	+	T02H6.1	0	6	0	1	1	4
cel_circ_1394	II	726810	727113	+	Y39F10B.1	0	0	1	1	0	3
cel_circ_1395	II	730498	730726	+	Y39F10B.1	0	0	0	0	3	0
cel_circ_1398	II	762283	765321	-	C08G5.7	2	5	1	0	0	2
cel_circ_1399	II	775996	776295	+	Y39F10A.1	2	0	2	0	0	0
cel_circ_1412	II	1128661	1132423	+	taf-6.1	2	4	0	0	0	0
cel_circ_1424	II	1315961	1317204	+	fcho-1	1	3	0	0	1	0
cel_circ_1428	II	1327837	1328827	+	jip-1	1	2	3	0	3	0
cel_circ_1430	II	1332372	1332670	+	jip-1	13	12	13	2	1	5
cel_circ_1432	II	1337065	1337672	+	jip-1	13	3	5	1	4	3
cel_circ_1435	II	1346070	1348705	+	jip-1	6	6	10	0	1	4
cel_circ_1439	II	1374404	1374988	-	rog-1	0	0	0	0	3	0
cel_circ_1446	II	1495641	1496687	-	emc-1	5	6	6	3	10	4
cel_circ_1447	II	1495641	1498368	-	emc-1	1	0	0	2	0	1
cel_circ_1448	II	1506550	1507225	+	fgt-1	9	4	4	5	4	3
cel_circ_1449	II	1508352	1508930	+	fgt-1	3	7	3	2	8	1
cel_circ_1453	II	1525354	1525624	-	Y51H7BR.7	3	1	2	0	2	4
cel_circ_1455	II	1618481	1619035	-	fbxa-166	0	0	0	1	0	3
cel_circ_1458	II	1680635	1681131	+	irld-36	1	2	0	0	0	0
cel_circ_1460	II	1948751	1949091	+	ZK250.2	1	2	0	1	2	0
cel_circ_1463	II	2179357	2179743	+	gba-1	0	1	0	0	3	2
cel_circ_1465	II	2184051	2185769	-	gba-2	0	2	0	0	1	2
cel_circ_1467	II	2188373	2188597	-	C33C12.9	4	2	2	1	0	0
cel_circ_1468	II	2193694	2194114	-	C33C12.10	5	7	5	5	6	1
cel_circ_1474	II	2217264	2218190	-	Y59C2A.3	0	3	0	0	0	0
cel_circ_1475	II	2233540	2235852	+	cct-3	1	1	5	2	0	1
cel_circ_1477	II	2235463	2235852	+	cct-3	2	1	0	2	1	0
cel_circ_1478	II	2238114	2238509	+	cct-3	0	0	0	3	3	0
cel_circ_1480	II	2246478	2246958	+	F54A3.2	5	2	6	1	3	4
cel_circ_1484	II	2336523	2337169	+	F43C11.7	0	0	0	3	0	1
cel_circ_1506	II	2504878	2505913	+	F59H5.1	3	0	0	0	0	0
cel_circ_1509	II	2509524	2509859	+	F59H5.1	2	3	12	5	7	8
cel_circ_1510	II	2509524	2510820	+	F59H5.1	0	0	1	2	0	1
cel_circ_1515	II	2600884	2601941	+	F33H12.1	0	0	0	0	3	0
cel_circ_1527	II	2796332	2796883	-	nhr-119	1	0	0	1	0	2
cel_circ_1536	II	2880696	2881658	-	hpo-20	0	3	4	0	1	0
cel_circ_1544	II	2903213	2904148	-	Y110A2AM.1	1	0	2	0	0	0
cel_circ_1545	II	2917234	2917500	-	Y110A2AR.3	1	0	2	2	1	1
cel_circ_1546	II	2923917	2924683	+	ZK355.2	6	10	8	2	2	1
cel_circ_1559	II	2986085	2986387	+	nhr-88	0	2	1	0	0	0
cel_circ_1563	II	3032780	3035340	+	B0454.6	0	0	0	1	2	0
cel_circ_1572	II	3127124	3127803	+	ins-31	8	2	7	5	4	3
cel_circ_1577	II	3253136	3255791	-	gcy-19	3	3	3	0	0	0
cel_circ_1578	II	3262806	3263074	+	F02E11.2	0	0	3	0	0	0
cel_circ_1584	II	3421668	3422998	-	nep-11	1	1	1	2	0	0
cel_circ_1587	II	3497404	3498912	-	Y49F6B.9	0	0	0	0	0	3
cel_circ_1592	II	3525909	3526473	-	ncs-6	10	5	15	2	2	0
cel_circ_1593	II	3525909	3527045	-	ncs-6	1	0	2	0	0	1
cel_circ_1599	II	3537006	3537395	-	apd-3	1	3	3	0	0	0
cel_circ_1613	II	3926917	3927982	-	F53C3.13	0	0	1	1	1	1
cel_circ_1616	II	3961689	3965554	+	sea-2	2	1	0	0	0	0
cel_circ_1620	II	4012450	4013218	+	ephx-1	7	1	5	13	19	8
cel_circ_1626	II	4132794	4133215	-	ast-1	3	0	0	0	2	1
cel_circ_1645	II	4574122	4579349	+	vab-1	0	0	0	0	1	2
cel_circ_1646	II	4578121	4579349	+	vab-1	8	3	2	2	7	1
cel_circ_1647	II	4578121	4582722	+	vab-1	1	1	3	2	0	0
cel_circ_1648	II	4582473	4582722	+	vab-1	1	0	2	4	5	1
cel_circ_1659	II	4917364	4917950	-	aagr-2	0	0	0	1	3	0
cel_circ_1663	II	4957829	4958473	-	ulp-2	4	3	13	7	5	0
cel_circ_1665	II	4972855	4975821	+	shc-2	1	2	0	1	0	3
cel_circ_1667	II	4983479	4986198	+	shc-2	0	0	0	1	3	0
cel_circ_1669	II	5029415	5030780	+	nsy-1	1	1	1	0	1	0
cel_circ_1672	II	5055616	5056174	+	rpl-22	0	0	3	0	0	0
cel_circ_1674	II	5086400	5090435	-	pld-1	2	3	5	0	3	1
cel_circ_1678	II	5180308	5180619	-	crh-2	0	0	0	0	3	0
cel_circ_1679	II	5183688	5184600	-	crh-2	0	1	1	2	3	3
cel_circ_1682	II	5206578	5206984	+	ampd-1	1	0	2	0	0	0
cel_circ_1714	II	5331486	5334801	+	vhp-1	0	3	0	1	7	3
cel_circ_1716	II	5336190	5336562	+	vhp-1	2	3	2	0	0	0
cel_circ_1742	II	5946480	5947315	-	casy-1	1	3	0	0	0	0
cel_circ_1745	II	5951421	5955724	-	casy-1	3	4	4	0	0	0
cel_circ_1759	II	6205947	6206648	-	daf-37	1	1	1	0	0	0
cel_circ_1762	II	6226470	6227155	-	C30B5.7	3	0	0	0	0	0
cel_circ_1781	II	6767287	6772446	-	agr-1	8	5	7	3	4	0
cel_circ_1786	II	6813083	6815626	+	snt-1	0	6	1	0	0	0
cel_circ_1789	II	6835021	6838091	+	egl-27	1	0	2	0	1	0
cel_circ_1792	II	6840193	6842605	+	egl-27	9	11	9	0	6	4
cel_circ_1805	II	6958952	6959421	-	tra-2	7	3	3	2	4	1
cel_circ_1808	II	7001721	7002966	+	unc-104	1	2	2	0	1	1
cel_circ_1828	II	7510833	7513975	-	glb-9	3	2	2	0	0	0
cel_circ_1830	II	7591134	7592024	-	syd-1	1	1	5	2	2	1
cel_circ_1832	II	7609118	7610264	+	lips-17	0	0	0	0	1	4
cel_circ_1836	II	7629491	7630064	-	pde-4	5	5	8	1	1	0
cel_circ_1839	II	7630883	7633798	-	pde-4	1	1	2	0	0	3
cel_circ_1840	II	7632258	7633798	-	pde-4	1	1	2	1	1	0
cel_circ_1843	II	7659587	7660514	-	alfa-1	2	1	2	0	3	3
cel_circ_1846	II	7725982	7730160	+	cpna-2	0	0	0	0	3	0
cel_circ_1847	II	7726368	7730160	+	cpna-2	0	0	0	3	3	1
cel_circ_1860	II	7924191	7926588	-	spv-1	0	3	2	1	0	0
cel_circ_1864	II	7988477	7989537	+	DH11.5	3	1	5	0	0	0
cel_circ_1865	II	7988477	7990108	+	DH11.5	0	0	3	0	0	0
cel_circ_1885	II	8309726	8310604	-	shw-1	5	9	14	0	1	0
cel_circ_1899	II	8495721	8497635	-	T13H5.1	2	3	7	2	2	2
cel_circ_1905	II	8581151	8581185	-	not_annotated	0	0	0	0	3	0
cel_circ_1914	II	8885180	8885542	+	ddx-19	1	2	1	1	4	4
cel_circ_1916	II	8887846	8888457	+	ddx-19	2	0	1	0	1	0
cel_circ_1927	II	9067047	9067660	-	T24B8.4	0	0	0	2	1	0
cel_circ_1928	II	9120176	9123336	+	jun-1	2	2	2	0	0	0
cel_circ_1936	II	9243903	9245388	+	T26C5.3	0	0	5	0	0	1
cel_circ_1937	II	9260490	9260958	-	aqp-2	3	1	5	0	1	0
cel_circ_1941	II	9304086	9304822	-	cam-1	88	80	93	14	41	20
cel_circ_1948	II	9364893	9365779	+	mel-11	4	0	0	0	0	1
cel_circ_1953	II	9622969	9624176	-	dnj-20	1	0	2	1	0	0
cel_circ_1956	II	9761951	9765907	+	shk-1	0	0	3	0	0	0
cel_circ_1957	II	9772576	9773065	-	ZK1321.4	1	1	1	3	2	0
cel_circ_1967	II	9994276	9998729	+	lec-3	1	0	2	0	2	1
cel_circ_1968	II	9994276	9999031	+	lec-3	0	0	1	2	1	1
cel_circ_1971	II	10010459	10010786	-	lec-2	1	1	1	2	3	5
cel_circ_1977	II	10059039	10060212	-	stg-1	4	0	0	1	0	1
cel_circ_1979	II	10059408	10059769	-	stg-1	3	0	0	0	0	0
cel_circ_1983	II	10160797	10161043	-	daf-19	2	1	0	0	3	0
cel_circ_1984	II	10160797	10163578	-	daf-19	3	1	3	0	3	0
cel_circ_1986	II	10166141	10169346	-	daf-19	2	5	8	4	9	2
cel_circ_2005	II	10457281	10461023	+	ZK673.11	4	4	7	3	1	0
cel_circ_2007	II	10545436	10546325	-	mnk-1	1	4	0	0	0	1
cel_circ_2008	II	10545638	10546325	-	mnk-1	0	3	0	0	0	0
cel_circ_2013	II	10677590	10679819	+	ptb-1	2	3	13	6	4	2
cel_circ_2016	II	10686756	10689212	+	ptb-1	1	1	1	0	0	0
cel_circ_2020	II	10723826	10725199	+	mks-5	0	0	5	0	0	0
cel_circ_2037	II	10754011	10754516	-	mpz-1	0	0	3	0	0	0
cel_circ_2042	II	10758889	10760255	-	mpz-1	1	1	2	0	1	0
cel_circ_2043	II	10763265	10764265	-	mpz-1	1	2	2	0	4	0
cel_circ_2045	II	10763265	10767370	-	mpz-1	4	8	6	2	1	3
cel_circ_2046	II	10763265	10772847	-	mpz-1	3	2	1	0	1	1
cel_circ_2047	II	10766636	10767370	-	mpz-1	0	0	3	1	0	0
cel_circ_2048	II	10766636	10772847	-	mpz-1	1	3	2	4	0	1
cel_circ_2054	II	10889689	10890880	+	ptr-8	1	1	1	3	3	1
cel_circ_2060	II	10983267	10986100	+	ptp-3	3	6	3	0	1	0
cel_circ_2065	II	10993895	10996274	+	ptp-3	10	5	4	4	4	4
cel_circ_2066	II	10993895	10999130	+	ptp-3	2	0	6	4	6	4
cel_circ_2076	II	11063411	11067762	-	unc-53	0	0	0	0	3	0
cel_circ_2079	II	11070715	11071331	-	unc-53	3	1	0	0	1	2
cel_circ_2082	II	11073410	11078791	-	unc-53	1	3	1	3	4	0
cel_circ_2084	II	11073410	11083959	-	unc-53	3	6	6	1	2	0
cel_circ_2085	II	11078719	11083959	-	unc-53	0	0	5	0	1	1
cel_circ_2088	II	11118372	11119156	+	mat-2	2	1	3	3	2	2
cel_circ_2101	II	11341269	11341952	-	lgc-20	2	3	12	0	0	1
cel_circ_2105	II	11385778	11388102	-	shn-1	0	3	0	0	0	0
cel_circ_2117	II	11678377	11679085	+	C47D12.2	0	1	2	0	0	0
cel_circ_2126	II	11758123	11759242	-	F44E5.4	3	0	0	0	0	0
cel_circ_2134	II	11760563	11760863	+	F44E5.5	1	1	3	0	0	0
cel_circ_2142	II	11958191	11958548	+	W03C9.6	0	1	2	2	2	3
cel_circ_2145	II	11979283	11979658	-	Y17G7B.20	2	2	0	0	2	1
cel_circ_2153	II	12069162	12069484	+	Y17G7B.22	30	29	31	8	13	6
cel_circ_2166	II	12229508	12232907	+	sinh-1	0	1	0	0	1	2
cel_circ_2168	II	12231293	12232907	+	sinh-1	1	5	2	1	3	1
cel_circ_2170	II	12271156	12273633	-	Y57A10A.27	2	1	1	0	0	0
cel_circ_2174	II	12340372	12341151	+	sop-2	0	0	0	0	0	4
cel_circ_2177	II	12364405	12365624	-	marc-5	1	2	1	1	1	0
cel_circ_2179	II	12376456	12379529	-	Y57A10B.2	2	10	4	0	2	0
cel_circ_2184	II	12498002	12498321	-	ador-1	2	0	1	0	0	0
cel_circ_2196	II	12654724	12655931	+	Y38E10A.20	1	2	1	1	0	1
cel_circ_2197	II	12669227	12670321	+	rgs-4	2	8	3	0	1	0
cel_circ_2204	II	12716760	12718893	+	tbc-17	0	2	5	0	0	1
cel_circ_2207	II	12721100	12721982	+	tbc-17	4	0	9	14	25	18
cel_circ_2212	II	12736142	12736204	-	snrp-200	0	0	1	0	1	2
cel_circ_2227	II	12965546	12966807	+	ptr-18	0	0	1	0	4	0
cel_circ_2230	II	12988223	12989334	+	cyd-1	1	0	1	1	0	2
cel_circ_2234	II	13023652	13025838	-	max-2	0	2	1	1	0	1
cel_circ_2236	II	13068740	13069192	+	zyx-1	3	0	0	0	1	0
cel_circ_2237	II	13068740	13069971	+	zyx-1	2	8	1	2	4	2
cel_circ_2246	II	13278175	13279768	+	Y48C3A.5	3	1	2	0	1	0
cel_circ_2255	II	13344967	13345325	-	dmsr-3	20	25	32	12	16	17
cel_circ_2261	II	13406142	13406452	+	efl-2	6	3	2	0	4	3
cel_circ_2262	II	13406142	13409116	+	efl-2	0	0	0	1	0	2
cel_circ_2267	II	13451307	13451834	-	pqn-27	0	0	2	0	3	0
cel_circ_2270	II	13489764	13490444	-	alh-7	0	0	4	0	0	0
cel_circ_2275	II	13514980	13515522	+	nep-17	0	0	0	1	2	4
cel_circ_2278	II	13536780	13537111	-	Y48E1B.2	1	1	5	2	0	0
cel_circ_2279	II	13536780	13541084	-	Y48E1B.2	1	0	3	0	0	0
cel_circ_2283	II	13571707	13571971	-	mrpl-37	0	0	0	0	3	0
cel_circ_2296	II	13802040	13803280	+	ZK131.11	6	5	7	6	6	5
cel_circ_2299	II	13815960	13816305	+	ZK131.11	0	3	0	0	0	0
cel_circ_2300	II	13815960	13816836	+	ZK131.11	3	1	1	0	0	0
cel_circ_2304	II	13862720	13864090	-	Y51H1A.2	2	0	3	2	0	0
cel_circ_2306	II	13865945	13866384	-	Y51H1A.2	0	0	0	1	0	2
cel_circ_2309	II	13884709	13885108	+	hda-10	0	2	1	0	0	0
cel_circ_2321	II	14093032	14093550	-	col-87	2	5	6	0	1	1
cel_circ_2324	II	14117296	14118110	-	K09E4.4	2	1	0	1	0	0
cel_circ_2325	II	14130470	14131771	-	K09E4.2	2	1	0	1	2	1
cel_circ_2326	II	14131202	14131771	-	K09E4.2	1	1	1	0	1	1
cel_circ_2328	II	14182896	14184278	+	efhd-1	7	5	3	1	0	1
cel_circ_2330	II	14187862	14188293	+	efhd-1	0	0	0	0	3	1
cel_circ_2333	II	14200807	14201904	+	ace-4	11	11	14	3	6	1
cel_circ_2350	II	14574488	14575193	+	madf-5	0	0	0	0	3	1
cel_circ_2351	II	14600902	14604075	+	tps-2	0	0	1	0	4	0
cel_circ_2355	II	14675475	14683304	-	ZC101.1	2	3	3	2	1	1
cel_circ_2356	II	14675475	14683545	-	ZC101.1	1	2	0	2	1	1
cel_circ_2358	II	14735275	14735807	-	npr-34	2	0	2	0	0	0
cel_circ_2364	II	14870698	14871104	+	R05H10.3	2	4	3	2	10	3
cel_circ_2365	II	14870698	14874918	+	R05H10.3	1	2	0	0	2	0
cel_circ_2380	II	15021652	15022809	+	Y53F4B.12	4	1	3	0	0	0
cel_circ_2384	II	15066181	15066505	-	Y53F4B.18	1	1	0	1	5	0
cel_circ_2387	II	15107151	15107680	+	Y53F4B.21	1	1	2	1	0	0
cel_circ_2389	II	15112168	15112626	+	Y53F4B.39	1	2	4	12	16	8
cel_circ_2390	II	15112190	15112621	-	not_annotated	0	2	2	1	0	1
cel_circ_2394	II	15222831	15223191	+	spsb-1	0	0	1	2	6	2
cel_circ_2408	III	81425	83558	-	attf-3	7	8	7	9	8	6
cel_circ_2414	III	187794	188131	-	mxl-2	2	1	0	0	0	0
cel_circ_2416	III	195292	198036	+	F40G9.17	0	1	3	1	0	0
cel_circ_2421	III	223904	224333	+	klp-20	0	2	1	0	0	0
cel_circ_2431	III	261125	261389	+	Y50D7A.3	2	0	1	2	1	0
cel_circ_2434	III	305648	306687	+	Y50D7A.1	11	22	7	6	14	4
cel_circ_2444	III	359008	381298	-	gsto-3	0	0	0	0	0	3
cel_circ_2445	III	368305	381298	-	gsto-3	0	3	1	0	0	2
cel_circ_2446	III	370386	371124	+	pll-1	0	0	0	2	1	0
cel_circ_2450	III	416948	418738	-	stim-1	2	0	1	0	0	0
cel_circ_2451	III	418089	418738	-	stim-1	3	0	0	0	0	1
cel_circ_2454	III	438130	439394	+	Y55B1BR.2	0	0	1	1	1	3
cel_circ_2461	III	543880	544079	+	T22F7.1	0	1	0	1	2	0
cel_circ_2462	III	565560	567737	+	B0353.1	2	2	2	3	4	1
cel_circ_2463	III	565560	572133	+	B0353.1	0	0	0	1	3	3
cel_circ_2470	III	646754	648267	+	orai-1	11	6	12	4	7	3
cel_circ_2483	III	730309	733074	-	pat-12	2	0	2	15	15	7
cel_circ_2484	III	730592	731804	-	pat-12	11	9	7	5	13	5
cel_circ_2499	III	775962	777005	-	alh-11	0	3	0	0	0	0
cel_circ_2501	III	786655	790148	-	snt-2	0	1	3	0	0	0
cel_circ_2505	III	834305	835213	+	zip-2	270	323	345	190	392	185
cel_circ_2507	III	862306	863278	+	arx-4	0	0	3	0	0	0
cel_circ_2515	III	985132	985699	+	tbc-10	0	0	0	0	3	1
cel_circ_2518	III	987252	987521	+	tbc-10	5	2	2	4	6	7
cel_circ_2521	III	995548	995864	+	trp-2	0	2	1	0	1	0
cel_circ_2522	III	995548	997753	+	trp-2	1	2	0	0	0	0
cel_circ_2528	III	1072387	1076555	-	uaf-1	2	3	5	2	4	1
cel_circ_2531	III	1074180	1076555	-	uaf-1	102	102	132	80	139	92
cel_circ_2533	III	1082994	1084461	+	par-2	4	1	1	3	5	7
cel_circ_2537	III	1108009	1108505	+	exc-6	0	0	2	0	3	1
cel_circ_2538	III	1109114	1109468	+	exc-6	1	4	2	2	2	1
cel_circ_2540	III	1126930	1129928	-	lgc-46	1	1	2	0	0	0
cel_circ_2543	III	1141818	1142183	+	Y71D11A.3	1	1	2	0	2	0
cel_circ_2544	III	1166064	1166409	+	cdh-12	1	0	0	0	1	2
cel_circ_2545	III	1171665	1173408	+	cdh-12	3	0	0	0	0	0
cel_circ_2550	III	1187306	1187751	-	Y119D3B.14	1	3	1	3	0	0
cel_circ_2553	III	1200200	1200471	-	mrpl-45	0	1	1	0	4	0
cel_circ_2555	III	1201475	1202008	-	mrpl-45	0	0	0	0	1	2
cel_circ_2557	III	1202548	1203709	+	Y119D3B.12	2	2	0	0	1	1
cel_circ_2567	III	1219387	1219667	-	pes-4	3	7	3	3	7	1
cel_circ_2569	III	1332007	1332625	+	Y82E9BL.19	5	2	6	2	0	0
cel_circ_2577	III	1461829	1463594	+	Y82E9BR.1	0	0	3	0	0	0
cel_circ_2581	III	1502899	1504288	+	M01G5.1	1	2	0	1	0	4
cel_circ_2585	III	1512881	1513135	-	M01G5.3	0	0	0	0	1	3
cel_circ_2587	III	1515560	1515904	-	M01G5.3	1	0	0	2	2	1
cel_circ_2592	III	1572553	1573007	+	rep-1	0	0	0	2	3	0
cel_circ_2594	III	1587809	1589444	-	sms-3	1	2	2	0	4	0
cel_circ_2595	III	1599267	1601138	-	not_annotated	0	1	0	3	7	1
cel_circ_2600	III	1629410	1630080	+	Y22D7AL.4	2	2	2	0	0	0
cel_circ_2605	III	1675433	1675692	-	Y22D7AR.6	13	13	14	20	42	17
cel_circ_2608	III	1724599	1725894	-	ser-4	5	3	0	0	2	0
cel_circ_2614	III	1799508	1800485	+	rimb-1	2	2	1	0	1	0
cel_circ_2615	III	1799700	1800485	+	rimb-1	1	2	0	0	0	0
cel_circ_2618	III	1801913	1803454	+	rimb-1	7	6	1	0	0	0
cel_circ_2619	III	1803085	1804395	+	rimb-1	1	6	1	0	0	0
cel_circ_2620	III	1811052	1811374	-	clp-4	11	10	11	8	3	8
cel_circ_2621	III	1811052	1811379	-	clp-4	0	0	1	0	0	3
cel_circ_2623	III	1814397	1815568	-	clp-4	7	4	2	0	4	1
cel_circ_2625	III	1827239	1832253	+	Y39A3CL.7	0	0	2	1	2	0
cel_circ_2627	III	1830466	1832253	+	Y39A3CL.7	0	0	1	1	3	4
cel_circ_2628	III	1830787	1833581	+	Y39A3CL.7	3	6	2	4	0	1
cel_circ_2629	III	1831815	1833581	+	Y39A3CL.7	0	2	1	0	0	1
cel_circ_2632	III	1856051	1857579	+	hlh-33	0	0	1	2	5	2
cel_circ_2633	III	1856051	1858772	+	hlh-33	0	0	2	0	3	0
cel_circ_2636	III	1870253	1870709	+	Y39A3CR.3	2	1	1	0	2	1
cel_circ_2638	III	1871710	1872277	+	Y39A3CR.3	4	0	2	1	5	3
cel_circ_2639	III	1878365	1878606	+	smi-1	2	1	0	1	1	0
cel_circ_2643	III	1907802	1911318	+	pqn-41	4	0	3	2	3	0
cel_circ_2646	III	1927677	1929473	+	pqn-41	6	7	7	1	6	8
cel_circ_2647	III	1929106	1929473	+	pqn-41	2	1	3	1	2	2
cel_circ_2651	III	1940659	1941753	-	F53A3.1	5	7	12	11	21	11
cel_circ_2652	III	1946069	1948055	-	polh-1	0	0	0	2	0	1
cel_circ_2653	III	1947644	1948055	-	polh-1	3	3	2	2	1	5
cel_circ_2662	III	2015131	2016032	-	ckr-2	3	4	2	1	3	0
cel_circ_2663	III	2015451	2016032	-	ckr-2	6	2	5	0	3	1
cel_circ_2667	III	2092709	2096156	+	Y48G9A.9	2	4	5	3	16	9
cel_circ_2668	III	2092709	2097313	+	Y48G9A.9	5	1	7	3	5	3
cel_circ_2676	III	2140092	2140332	+	frl-1	2	0	4	4	3	0
cel_circ_2682	III	2178449	2179008	+	gcn-1	4	3	2	2	1	1
cel_circ_2683	III	2189303	2189780	+	gcn-1	1	0	0	1	4	0
cel_circ_2684	III	2199978	2202981	+	C39B5.6	0	1	3	0	1	0
cel_circ_2685	III	2204630	2205729	+	C39B5.6	3	2	0	3	4	3
cel_circ_2688	III	2269329	2270209	-	fbxa-48	1	0	2	0	2	3
cel_circ_2690	III	2323128	2323743	+	iffb-1	0	0	0	2	0	1
cel_circ_2692	III	2352182	2353657	+	gip-1	0	0	0	0	3	0
cel_circ_2696	III	2356455	2358864	+	gip-1	0	0	2	1	0	2
cel_circ_2700	III	2386429	2387569	-	H14E04.3	3	1	0	0	0	0
cel_circ_2710	III	2479489	2480039	+	smg-6	1	3	6	3	8	6
cel_circ_2712	III	2479961	2482098	+	smg-6	0	0	4	0	2	0
cel_circ_2713	III	2482737	2483120	+	smg-6	4	1	3	5	8	2
cel_circ_2714	III	2482737	2484286	+	smg-6	0	0	0	1	2	0
cel_circ_2716	III	2483769	2484286	+	smg-6	1	0	0	1	4	0
cel_circ_2717	III	2487769	2489143	+	Y54F10AL.1	6	6	11	9	11	7
cel_circ_2725	III	2524632	2525534	-	rbc-2	1	2	0	0	0	0
cel_circ_2736	III	2579687	2580640	+	Y71H2B.8	1	2	0	0	0	1
cel_circ_2739	III	2681998	2682228	-	pbo-1	1	2	3	0	2	1
cel_circ_2740	III	2681998	2685145	-	pbo-1	2	1	1	0	0	0
cel_circ_2742	III	2708874	2709726	-	Y71H2AM.10	4	3	5	1	3	0
cel_circ_2744	III	2710678	2713211	-	Y71H2AM.10	0	4	0	0	0	0
cel_circ_2747	III	2745138	2745409	-	Y71H2AM.14	1	1	1	4	4	3
cel_circ_2748	III	2745138	2745487	-	Y71H2AM.14	1	0	0	1	1	3
cel_circ_2749	III	2748584	2749321	-	Y71H2AM.15	0	0	0	2	1	1
cel_circ_2753	III	2808625	2809124	+	Y71H2AM.3	0	1	3	0	0	0
cel_circ_2757	III	2844396	2845208	+	H34I24.2	0	0	0	3	1	1
cel_circ_2762	III	2920610	2921016	-	R10F2.4	4	4	6	1	1	1
cel_circ_2763	III	2933340	2934119	+	cdh-1	2	0	1	1	2	0
cel_circ_2765	III	2934413	2934657	+	cdh-1	2	0	5	1	1	1
cel_circ_2767	III	2957013	2957454	+	H05C05.1	1	1	2	0	0	0
cel_circ_2771	III	2987064	2987432	+	Y55D5A.1	1	0	0	1	1	2
cel_circ_2774	III	2999852	3010523	-	daf-2	0	4	0	1	2	1
cel_circ_2782	III	3019170	3019673	-	daf-2	1	2	6	2	9	5
cel_circ_2784	III	3061745	3062885	-	H06I04.6	0	0	0	2	2	4
cel_circ_2787	III	3068672	3068713	+	ubl-1	0	2	4	4	7	7
cel_circ_2789	III	3076305	3076690	+	H06I04.3	2	2	0	5	6	3
cel_circ_2791	III	3086674	3088585	+	sft-1	1	0	3	4	3	0
cel_circ_2792	III	3088311	3088585	+	sft-1	12	10	14	6	5	4
cel_circ_2793	III	3088311	3089684	+	sft-1	13	15	22	9	9	2
cel_circ_2795	III	3103169	3103955	-	Y53G8B.2	1	0	0	1	1	1
cel_circ_2796	III	3103643	3103955	-	Y53G8B.2	0	0	0	2	4	1
cel_circ_2798	III	3109895	3110184	-	Y53G8B.3	0	0	0	2	1	0
cel_circ_2799	III	3113771	3114043	-	nipa-1	23	15	22	22	23	26
cel_circ_2808	III	3188423	3189598	+	mks-1	0	4	1	0	1	1
cel_circ_2810	III	3199218	3199516	-	heh-1	0	1	3	0	0	0
cel_circ_2811	III	3201855	3202133	-	frm-8	2	0	1	0	0	0
cel_circ_2815	III	3269104	3278710	-	Y53G8AM.8	0	1	0	1	2	0
cel_circ_2819	III	3299377	3299868	+	Y53G8AR.5	17	21	34	23	30	20
cel_circ_2827	III	3358585	3360075	+	gei-1	0	0	1	2	2	2
cel_circ_2833	III	3383008	3384189	-	hecw-1	0	0	0	1	0	2
cel_circ_2845	III	3498173	3499057	-	M01F1.9	0	2	1	1	3	0
cel_circ_2847	III	3535908	3536338	-	C54C6.6	3	4	15	0	1	1
cel_circ_2849	III	3573587	3574376	+	nhr-6	5	2	3	0	0	0
cel_circ_2851	III	3573858	3574376	+	nhr-6	2	0	1	0	0	0
cel_circ_2852	III	3574148	3574376	+	nhr-6	5	0	2	0	0	1
cel_circ_2868	III	3683622	3685808	-	npr-15	1	3	0	0	0	0
cel_circ_2872	III	3739484	3739613	+	F34D10.4	1	1	4	0	0	0
cel_circ_2882	III	3880116	3882547	-	tir-1	26	22	33	12	15	8
cel_circ_2883	III	3880116	3891454	-	tir-1	1	5	3	0	1	0
cel_circ_2885	III	3890925	3891454	-	tir-1	3	2	2	1	3	0
cel_circ_2895	III	3990320	3990826	-	glb-11	0	1	0	2	3	0
cel_circ_2896	III	3990320	3990835	-	glb-11	2	2	5	0	0	0
cel_circ_2897	III	4014092	4014453	+	C36E8.4	0	0	0	2	1	0
cel_circ_2901	III	4066396	4066758	-	not_annotated	0	1	1	1	0	2
cel_circ_2903	III	4069250	4069947	-	not_annotated	8	11	19	3	2	0
cel_circ_2909	III	4139286	4144967	+	unc-103	2	3	0	0	0	0
cel_circ_2922	III	4253292	4253924	-	T08A11.1	1	0	0	0	2	2
cel_circ_2937	III	4292614	4293399	-	nth-1	2	0	0	0	2	2
cel_circ_2950	III	4526001	4526041	+	cdh-4	0	6	0	0	0	4
cel_circ_2951	III	4526042	4526384	+	cdh-4	0	0	3	0	0	0
cel_circ_2956	III	4651765	4652308	+	ppm-2	4	7	12	5	13	1
cel_circ_2962	III	4837731	4838260	+	acbp-7	2	7	2	0	0	0
cel_circ_2964	III	4840739	4841403	+	acbp-7	2	1	0	0	0	0
cel_circ_2971	III	4975711	4977328	+	nca-2	0	0	3	0	0	0
cel_circ_2986	III	5148594	5149578	-	Y54H5A.2	1	1	4	2	1	0
cel_circ_2991	III	5236892	5237473	+	prx-10	2	6	3	8	13	11
cel_circ_3013	III	5585639	5586390	+	F56D2.3	0	1	2	1	1	0
cel_circ_3015	III	5625863	5626872	+	daf-4	2	5	5	0	5	0
cel_circ_3016	III	5635479	5645305	+	ckk-1	0	2	5	2	3	1
cel_circ_3022	III	5716337	5716755	+	arf-1.2	2	1	0	3	0	0
cel_circ_3036	III	5817672	5818480	+	sma-4	0	0	0	1	3	1
cel_circ_3041	III	5894079	5895679	-	pxl-1	0	0	0	2	1	0
cel_circ_3047	III	5941217	5941494	+	ubq-1	1	0	2	0	0	1
cel_circ_3059	III	5957692	5958244	-	nono-1	2	3	1	0	1	0
cel_circ_3061	III	5972897	5973401	-	mlp-1	0	0	1	3	12	5
cel_circ_3064	III	6003151	6005333	+	T04C9.1	0	3	0	0	0	0
cel_circ_3070	III	6126670	6127921	-	mvk-1	5	6	3	3	3	1
cel_circ_3075	III	6130781	6131747	-	mvk-1	0	0	3	1	0	0
cel_circ_3082	III	6314196	6315419	+	gar-2	2	1	1	0	0	0
cel_circ_3084	III	6317712	6319456	+	gar-2	1	0	2	3	0	0
cel_circ_3089	III	6343932	6346490	+	not_annotated	0	6	0	0	0	1
cel_circ_3090	III	6353603	6358682	+	akap-1	0	3	0	0	0	0
cel_circ_3091	III	6354399	6355128	+	akap-1	11	8	9	0	3	0
cel_circ_3092	III	6354399	6356535	+	akap-1	15	11	7	1	7	1
cel_circ_3096	III	6354399	6358682	+	akap-1	6	7	7	0	0	0
cel_circ_3098	III	6356419	6356535	+	akap-1	4	0	0	0	0	0
cel_circ_3100	III	6357813	6358090	+	akap-1	1	1	1	0	0	0
cel_circ_3110	III	6591706	6592175	-	F20H11.1	3	2	3	7	5	4
cel_circ_3117	III	6679024	6684583	+	rbf-1	2	1	0	0	0	0
cel_circ_3118	III	6696751	6698092	+	rbf-1	1	2	1	0	0	1
cel_circ_3119	III	6696751	6698910	+	rbf-1	3	2	5	1	0	2
cel_circ_3127	III	6700028	6702432	+	rbf-1	4	0	0	0	0	0
cel_circ_3140	III	6823152	6823501	+	ten-1	10	6	9	10	14	9
cel_circ_3142	III	6830392	6831448	+	ten-1	0	2	0	1	2	0
cel_circ_3154	III	6996481	6997896	+	prk-1	4	4	4	7	8	7
cel_circ_3156	III	7014309	7017424	+	lgc-38	7	10	9	3	0	1
cel_circ_3158	III	7015076	7017424	+	lgc-38	7	6	3	1	3	2
cel_circ_3163	III	7140811	7141220	-	glr-2	15	11	6	4	10	3
cel_circ_3164	III	7140811	7142035	-	glr-2	52	70	64	16	36	13
cel_circ_3173	III	7258995	7264373	+	B0361.4	0	2	1	0	0	0
cel_circ_3182	III	7370922	7373496	-	mml-1	5	19	9	5	14	1
cel_circ_3188	III	7483374	7486535	-	mup-4	1	1	0	2	5	2
cel_circ_3193	III	7727126	7727837	+	ZK112.3	2	0	5	0	2	1
cel_circ_3204	III	8014408	8015032	-	F44B9.5	4	13	11	0	3	3
cel_circ_3206	III	8092390	8092981	+	idi-1	3	0	0	0	0	0
cel_circ_3214	III	8221841	8222632	+	C30A5.4	2	3	0	0	0	0
cel_circ_3217	III	8282109	8282358	+	mig-10	0	5	1	1	0	1
cel_circ_3218	III	8294037	8300730	+	mig-10	2	2	6	0	1	0
cel_circ_3220	III	8303145	8303451	+	mig-10	0	1	2	0	0	0
cel_circ_3224	III	8388898	8389618	-	ZK353.4	3	0	0	0	0	0
cel_circ_3228	III	8440738	8441114	-	ufbp-1	1	2	1	0	1	0
cel_circ_3231	III	8446451	8446516	-	hsp-110	1	0	5	1	0	1
cel_circ_3235	III	8495018	8498559	+	pac-1	0	0	0	2	0	2
cel_circ_3236	III	8502620	8502841	+	pac-1	0	2	1	0	0	1
cel_circ_3237	III	8502620	8509551	+	pac-1	0	0	0	1	1	1
cel_circ_3238	III	8507630	8509551	+	pac-1	1	0	3	0	0	1
cel_circ_3242	III	8536347	8539923	+	trp-1	0	1	4	1	0	0
cel_circ_3246	III	8640890	8643739	-	twk-7	0	0	2	2	2	0
cel_circ_3247	III	8653155	8653560	-	F22B7.9	1	0	2	2	1	2
cel_circ_3254	III	8739438	8741117	-	pdhk-2	10	6	2	1	3	2
cel_circ_3259	III	8774312	8775954	+	K02D10.1	2	2	5	0	2	0
cel_circ_3260	III	8798398	8799645	+	zfp-1	2	3	4	3	4	0
cel_circ_3287	III	9262834	9266198	-	clip-1	0	0	1	1	2	0
cel_circ_3290	III	9264185	9267619	-	clip-1	0	0	3	0	0	0
cel_circ_3298	III	9446088	9446604	-	F54C8.6	1	5	1	5	4	5
cel_circ_3300	III	9459101	9460223	+	spk-1	0	0	0	0	3	0
cel_circ_3301	III	9459101	9460694	+	spk-1	0	0	1	0	3	1
cel_circ_3304	III	9515823	9516248	-	F55H2.7	0	0	2	0	3	1
cel_circ_3305	III	9527554	9528157	+	ZK1098.6	2	4	3	0	4	3
cel_circ_3313	III	9742945	9743339	-	T05G5.1	0	0	0	1	2	0
cel_circ_3315	III	9799107	9799423	+	ZK632.2	1	2	0	3	3	2
cel_circ_3329	III	10152795	10153126	+	nac-3	7	11	13	2	5	2
cel_circ_3332	III	10164952	10165486	+	mua-3	1	0	0	2	2	0
cel_circ_3339	III	10327557	10328002	-	nex-2	0	1	0	1	1	1
cel_circ_3340	III	10329158	10329547	-	nex-2	9	5	11	23	20	26
cel_circ_3341	III	10329158	10329792	-	nex-2	0	2	4	4	12	6
cel_circ_3364	III	10563278	10564291	+	rab-30	1	2	0	0	2	2
cel_circ_3366	III	10573283	10575420	-	Y45F3A.4	0	3	1	0	0	0
cel_circ_3374	III	10667690	10669340	+	cnt-2	1	4	2	3	5	1
cel_circ_3381	III	10754515	10755194	-	hpl-2	3	1	1	0	0	0
cel_circ_3388	III	10772310	10773057	+	dpy-28	4	0	0	1	2	0
cel_circ_3390	III	10816384	10816844	-	sca-1	0	3	1	3	0	2
cel_circ_3399	III	10990731	10991177	+	W05B2.7	0	0	0	3	0	0
cel_circ_3401	III	10993125	10994399	-	dmsr-5	1	5	5	2	1	1
cel_circ_3404	III	11024082	11025468	+	kvs-4	5	13	12	0	3	3
cel_circ_3407	III	11042093	11045515	+	Y48A6B.10	0	2	1	0	1	0
cel_circ_3412	III	11067154	11067621	+	rsa-2	3	3	2	1	1	1
cel_circ_3439	III	11294239	11302925	+	smc-3	1	3	0	0	0	0
cel_circ_3444	III	11338314	11341097	+	T28D6.5	2	0	5	0	0	0
cel_circ_3450	III	11439441	11440602	-	sbp-1	0	0	0	1	1	1
cel_circ_3451	III	11468692	11470806	-	bed-2	0	0	3	0	0	0
cel_circ_3452	III	11486813	11487345	-	Y66A7A.2	1	0	1	0	3	0
cel_circ_3454	III	11676421	11688336	+	crh-1	1	0	1	3	3	0
cel_circ_3456	III	11685210	11688336	+	crh-1	2	2	5	2	2	0
cel_circ_3457	III	11688126	11688336	+	crh-1	0	0	2	1	2	4
cel_circ_3458	III	11688132	11688336	+	crh-1	34	31	42	19	28	22
cel_circ_3465	III	11760685	11773681	-	gbf-1	2	0	2	1	4	3
cel_circ_3466	III	11764241	11773681	-	gbf-1	0	3	4	1	3	2
cel_circ_3467	III	11767903	11768343	-	gbf-1	0	0	0	0	5	0
cel_circ_3468	III	11767903	11773681	-	gbf-1	0	13	8	9	9	6
cel_circ_3471	III	11770198	11773681	-	gbf-1	11	15	21	12	22	10
cel_circ_3475	III	11820685	11821364	-	maa-1	0	0	0	3	1	0
cel_circ_3479	III	11853550	11857350	-	Y56A3A.2	0	2	1	0	0	0
cel_circ_3480	III	11863399	11865720	-	taf-12	2	2	1	0	0	0
cel_circ_3481	III	11864947	11866206	-	taf-12	0	2	1	2	0	2
cel_circ_3484	III	11897006	11898269	-	Y56A3A.11	1	0	1	2	0	2
cel_circ_3492	III	11982554	11983682	+	Y56A3A.31	0	3	0	1	2	0
cel_circ_3506	III	12193412	12198381	-	osm-12	2	1	3	0	0	0
cel_circ_3514	III	12329464	12329812	+	zip-12	1	4	7	13	25	12
cel_circ_3516	III	12329464	12330872	+	zip-12	5	11	12	18	26	13
cel_circ_3518	III	12336907	12337351	+	zip-1	1	0	0	1	2	0
cel_circ_3528	III	12448105	12450537	-	ani-1	8	3	2	2	5	6
cel_circ_3529	III	12461318	12461659	+	Y49E10.21	0	0	0	1	1	1
cel_circ_3530	III	12475693	12481147	+	cccp-1	0	0	4	0	0	0
cel_circ_3532	III	12480942	12481754	+	cccp-1	2	1	0	0	0	0
cel_circ_3546	III	12559999	12561879	-	Y111B2A.9	1	2	1	0	0	0
cel_circ_3549	III	12559999	12575376	-	Y111B2A.9	0	0	0	0	3	0
cel_circ_3550	III	12559999	12587332	-	Y111B2A.9	1	0	2	0	0	0
cel_circ_3551	III	12561315	12561879	-	Y111B2A.9	1	0	1	2	2	1
cel_circ_3552	III	12561315	12563099	-	Y111B2A.9	1	0	6	1	0	0
cel_circ_3554	III	12572642	12575376	-	Y111B2A.9	1	2	5	3	0	3
cel_circ_3555	III	12572642	12587332	-	Y111B2A.9	6	4	0	0	0	2
cel_circ_3558	III	12619333	12619733	+	Y111B2A.12	0	3	0	0	0	1
cel_circ_3561	III	12631927	12634929	+	pqn-80	3	3	5	0	1	2
cel_circ_3562	III	12635548	12635860	+	pqn-80	5	4	3	3	3	3
cel_circ_3565	III	12644471	12645310	+	pqn-80	0	1	2	2	1	0
cel_circ_3566	III	12649659	12650328	+	pqn-80	0	3	1	0	1	0
cel_circ_3569	III	12673677	12678915	+	elpc-2	0	0	3	0	1	0
cel_circ_3571	III	12701208	12702365	+	Y111B2A.24	1	1	0	1	2	0
cel_circ_3573	III	12739984	12742049	+	ssl-1	0	4	1	1	1	3
cel_circ_3579	III	12786997	12789938	+	lgc-37	2	2	1	0	0	0
cel_circ_3584	III	12943720	12946227	+	unc-25	3	4	6	1	2	4
cel_circ_3594	III	13093882	13096916	-	pqn-83	3	2	2	4	6	0
cel_circ_3598	III	13125392	13130565	+	zig-8	0	0	3	0	1	1
cel_circ_3599	III	13125392	13132875	+	zig-8	0	2	1	0	1	0
cel_circ_3600	III	13129138	13130565	+	zig-8	3	7	4	0	1	1
cel_circ_3604	III	13168013	13169155	-	snpc-1.2	0	0	0	3	0	1
cel_circ_3607	III	13194529	13194860	+	gly-5	0	0	1	1	0	2
cel_circ_3608	III	13224731	13225128	+	Y43F4A.1	4	2	1	0	3	1
cel_circ_3610	III	13277261	13277527	+	unc-64	1	2	0	0	0	0
cel_circ_3618	III	13366529	13367116	-	T03F6.7	2	0	1	0	0	0
cel_circ_3624	III	13449674	13450746	-	cua-1	1	2	2	0	0	1
cel_circ_3630	III	13510009	13510551	-	mlh-1	2	1	3	1	4	1
cel_circ_3633	III	13564250	13564937	-	aldo-1	1	1	1	0	0	0
cel_circ_3636	III	13627819	13629054	-	arrd-17	5	0	1	0	0	0
cel_circ_3637	III	13628802	13629236	-	arrd-17	3	1	0	1	0	0
cel_circ_3647	III	13719826	13720282	+	lit-1	1	2	3	2	1	2
cel_circ_3649	III	13728743	13731679	-	W06F12.2	0	0	1	1	2	0
cel_circ_3652	III	13782580	13783453	+	3R5.2	2	1	0	0	0	0
cel_circ_3660	IV	91986	92910	+	tpa-1	3	1	0	1	0	1
cel_circ_3661	IV	91986	93830	+	tpa-1	9	4	5	8	15	5
cel_circ_3663	IV	91986	98890	+	tpa-1	16	20	17	15	38	13
cel_circ_3669	IV	103933	108287	+	tpa-1	6	4	5	1	6	1
cel_circ_3674	IV	139730	140698	-	col-99	3	0	1	0	0	0
cel_circ_3677	IV	140543	141418	-	col-99	3	0	1	0	1	0
cel_circ_3680	IV	235398	237450	-	R02D3.4	0	2	2	0	0	1
cel_circ_3684	IV	340335	347302	+	cdh-8	1	1	1	0	0	1
cel_circ_3688	IV	395689	395732	+	T07A9.9	1	3	1	0	0	0
cel_circ_3689	IV	407747	408035	-	kgb-1	0	1	3	2	2	0
cel_circ_3697	IV	513836	517669	-	pig-1	4	5	7	0	0	1
cel_circ_3701	IV	619229	619773	+	C18H7.1	0	1	2	5	4	3
cel_circ_3703	IV	677611	677986	+	K11H12.5	2	1	0	0	0	0
cel_circ_3704	IV	677611	678469	+	K11H12.5	10	3	10	48	52	26
cel_circ_3719	IV	805117	805352	+	Y55F3BL.4	2	0	1	0	0	0
cel_circ_3722	IV	811529	812567	-	Y55F3BL.2	6	3	3	1	1	0
cel_circ_3724	IV	851994	852438	-	lem-4	3	2	4	8	4	1
cel_circ_3726	IV	928382	928991	+	lgc-30	7	6	4	1	4	3
cel_circ_3728	IV	928883	929705	+	lgc-30	1	3	0	0	1	0
cel_circ_3738	IV	981560	981993	+	plx-1	0	1	1	3	0	1
cel_circ_3740	IV	1007537	1008604	-	Y55F3AM.9	1	0	0	2	2	5
cel_circ_3741	IV	1015443	1015993	+	Y55F3AM.3	0	0	3	0	0	0
cel_circ_3754	IV	1111977	1112546	-	srx-14	0	0	4	0	2	0
cel_circ_3756	IV	1172069	1173442	+	cec-2	0	2	0	0	0	3
cel_circ_3757	IV	1174637	1174970	+	cec-2	1	3	1	1	4	2
cel_circ_3758	IV	1187801	1189357	+	mdt-20	1	2	2	0	2	0
cel_circ_3759	IV	1187801	1191074	+	mdt-20	18	20	22	10	23	9
cel_circ_3761	IV	1289629	1290017	+	plst-1	1	0	3	0	3	0
cel_circ_3762	IV	1289629	1292695	+	plst-1	0	0	0	1	2	0
cel_circ_3770	IV	1386215	1388703	+	nhr-41	5	5	14	12	14	5
cel_circ_3773	IV	1412841	1413213	-	Y77E11A.7	3	2	4	0	1	0
cel_circ_3775	IV	1417704	1418679	-	Y77E11A.7	6	6	7	10	10	4
cel_circ_3784	IV	1499862	1500984	+	Y77E11A.1	1	0	5	2	1	0
cel_circ_3792	IV	1572113	1572465	-	npp-8	2	3	2	1	7	1
cel_circ_3795	IV	1610866	1611242	+	dsl-3	0	0	1	2	4	0
cel_circ_3797	IV	1630502	1636154	-	not_annotated	7	23	14	3	12	2
cel_circ_3798	IV	1641583	1642086	-	nhr-274	0	4	5	0	2	3
cel_circ_3800	IV	1673811	1674298	+	Y41D4B.1	10	10	6	2	4	2
cel_circ_3802	IV	1731157	1731506	-	Y41D4A.5	1	1	0	1	1	3
cel_circ_3814	IV	1860836	1865469	+	egl-4	17	13	18	11	14	7
cel_circ_3819	IV	1913454	1914930	+	egl-18	0	0	3	0	1	0
cel_circ_3821	IV	1933690	1938199	+	denn-4	15	15	21	11	17	8
cel_circ_3823	IV	1943589	1944944	+	denn-4	1	6	3	3	7	3
cel_circ_3824	IV	1943589	1946169	+	denn-4	0	1	0	1	2	0
cel_circ_3825	IV	1945831	1946169	+	denn-4	1	2	0	0	0	0
cel_circ_3826	IV	1965858	1966436	+	Y48A5A.1	5	4	4	1	2	5
cel_circ_3827	IV	1986268	1986737	+	Y76B12C.6	0	0	0	0	3	0
cel_circ_3832	IV	2000902	2001310	+	xpc-1	0	2	0	0	1	2
cel_circ_3835	IV	2019244	2021132	-	cpsf-1	4	7	7	3	2	3
cel_circ_3839	IV	2027471	2030384	-	cpsf-1	0	0	1	2	2	2
cel_circ_3840	IV	2029046	2030384	-	cpsf-1	2	0	4	3	0	1
cel_circ_3842	IV	2051495	2051826	+	R05C11.4	1	0	4	0	0	0
cel_circ_3843	IV	2070544	2070859	+	arrd-26	1	4	2	0	1	1
cel_circ_3844	IV	2086547	2088723	+	mca-2	0	2	3	0	0	0
cel_circ_3846	IV	2109697	2110783	-	che-6	1	1	1	0	0	0
cel_circ_3848	IV	2122796	2123209	+	glb-7	44	59	39	6	10	4
cel_circ_3852	IV	2154971	2155396	-	gcy-37	0	1	0	0	2	1
cel_circ_3853	IV	2163350	2164872	-	C54E4.4	2	0	2	1	1	0
cel_circ_3861	IV	2188111	2189843	+	Y71G10AL.1	0	1	1	3	3	3
cel_circ_3862	IV	2188111	2191545	+	Y71G10AL.1	0	2	1	1	0	5
cel_circ_3863	IV	2188111	2192703	+	Y71G10AL.1	0	1	0	0	3	1
cel_circ_3867	IV	2206415	2208052	+	Y71G10AR.4	2	0	0	1	0	2
cel_circ_3869	IV	2227080	2227474	+	T04C4.1	18	16	15	12	17	12
cel_circ_3871	IV	2228258	2230106	+	T04C4.1	0	0	4	1	1	1
cel_circ_3873	IV	2228258	2233906	+	T04C4.1	1	2	0	0	0	0
cel_circ_3874	IV	2229796	2230106	+	T04C4.1	9	6	9	21	12	12
cel_circ_3876	IV	2230694	2230962	+	T04C4.1	4	0	3	4	0	3
cel_circ_3879	IV	2266198	2267311	-	M70.5	1	1	1	0	4	2
cel_circ_3880	IV	2272928	2273456	-	M70.5	3	3	4	6	2	3
cel_circ_3881	IV	2278892	2279181	-	lin-1	5	4	6	22	44	18
cel_circ_3883	IV	2309523	2311171	-	vha-11	2	1	0	2	0	0
cel_circ_3891	IV	2342529	2342808	-	ppgn-1	2	3	0	1	2	1
cel_circ_3895	IV	2351509	2351879	+	tftc-1	3	4	2	2	0	0
cel_circ_3898	IV	2357635	2358989	+	tftc-1	0	3	0	0	1	1
cel_circ_3899	IV	2357635	2361673	+	tftc-1	0	1	0	2	0	1
cel_circ_3900	IV	2372640	2373269	+	tftc-1	0	2	0	1	2	1
cel_circ_3901	IV	2375824	2379002	+	tftc-1	1	0	3	0	0	1
cel_circ_3903	IV	2386588	2386801	+	Y38F2AR.3	2	1	0	0	0	0
cel_circ_3904	IV	2390821	2391249	+	eri-5	1	7	3	8	3	5
cel_circ_3905	IV	2390821	2393358	+	eri-5	0	1	4	4	3	1
cel_circ_3907	IV	2392022	2393661	+	eri-5	1	0	4	1	1	2
cel_circ_3910	IV	2399828	2400590	-	Y38F2AR.12	0	0	2	2	1	1
cel_circ_3911	IV	2403911	2404482	-	Y38F2AR.12	1	1	0	0	1	2
cel_circ_3919	IV	2499194	2502025	+	Y69A2AR.16	2	0	1	0	0	0
cel_circ_3920	IV	2499194	2504497	+	Y69A2AR.16	1	4	0	1	0	0
cel_circ_3922	IV	2515057	2515385	+	Y69A2AR.16	4	1	2	3	4	4
cel_circ_3924	IV	2544407	2544687	+	sprr-3	0	1	5	0	0	0
cel_circ_3925	IV	2547107	2547894	+	sprr-3	2	0	4	0	0	0
cel_circ_3929	IV	2652818	2654001	-	Y69A2AR.31	16	23	25	3	5	2
cel_circ_3930	IV	2659303	2664003	-	Y69A2AR.31	1	1	0	0	4	0
cel_circ_3938	IV	2706135	2706602	-	ubc-8	20	8	17	12	28	8
cel_circ_3945	IV	2768165	2768629	-	Y54G2A.11	4	1	4	9	6	1
cel_circ_3947	IV	2770669	2771109	-	Y54G2A.11	1	1	0	1	4	0
cel_circ_3951	IV	2849728	2850129	+	Y54G2A.40	9	3	5	3	4	2
cel_circ_3957	IV	2968811	2969325	-	lad-2	0	1	2	0	0	2
cel_circ_3959	IV	2973461	2973962	-	lad-2	2	4	2	1	1	0
cel_circ_3964	IV	2995250	2995573	-	Y54G2A.26	2	1	0	2	2	3
cel_circ_3965	IV	3028445	3028942	-	ndnf-1	1	0	0	7	1	4
cel_circ_3973	IV	3116622	3121681	-	mca-3	0	4	5	2	2	4
cel_circ_3981	IV	3183770	3183846	-	not_annotated	0	0	3	0	0	0
cel_circ_3983	IV	3222442	3225884	+	Y67D8A.2	0	3	2	1	1	2
cel_circ_3993	IV	3380913	3381152	-	B0546.3	1	0	0	2	1	0
cel_circ_4009	IV	3615458	3616232	-	cha-1	1	3	4	1	4	0
cel_circ_4010	IV	3665022	3667476	-	Y37E11AL.6	0	1	2	0	0	0
cel_circ_4011	IV	3684832	3686865	-	map-1	0	0	0	1	1	1
cel_circ_4012	IV	3689556	3689875	-	taf-6.2	0	0	3	0	0	0
cel_circ_4015	IV	3718930	3719867	-	Y37E11AM.3	0	0	0	0	6	4
cel_circ_4028	IV	3870642	3871439	+	F37C4.4	1	4	1	4	15	10
cel_circ_4030	IV	3989543	3991440	+	clec-78	0	0	0	1	0	2
cel_circ_4040	IV	4044728	4044992	+	cdc-73	3	0	1	0	2	2
cel_circ_4041	IV	4044728	4045479	+	cdc-73	4	0	1	1	1	0
cel_circ_4042	IV	4044728	4046306	+	cdc-73	2	0	4	2	8	1
cel_circ_4044	IV	4104000	4104389	+	ubc-1	0	1	0	1	2	1
cel_circ_4052	IV	4295731	4297757	-	F15E6.9	2	1	2	0	2	0
cel_circ_4056	IV	4381539	4381577	+	F55F10.1	0	1	1	1	2	0
cel_circ_4064	IV	4470713	4470824	-	M01H9.3	0	0	0	0	3	0
cel_circ_4069	IV	4497869	4499821	-	gbb-2	10	3	5	0	2	1
cel_circ_4078	IV	4577918	4580287	+	F28E10.1	5	3	6	0	0	1
cel_circ_4079	IV	4577918	4586372	+	F28E10.1	1	3	2	0	0	0
cel_circ_4080	IV	4577918	4587504	+	F28E10.1	1	3	0	0	0	0
cel_circ_4081	IV	4578786	4581458	+	F28E10.1	0	1	2	0	0	0
cel_circ_4100	IV	4992816	4993396	+	str-162	3	0	0	0	0	0
cel_circ_4106	IV	5443713	5444242	+	mgl-3	0	2	1	0	1	0
cel_circ_4107	IV	5445482	5446409	+	mgl-3	14	25	23	6	6	3
cel_circ_4110	IV	5551134	5554376	+	T12E12.1	9	14	10	3	21	3
cel_circ_4119	IV	5900899	5901413	-	H04M03.12	3	0	1	0	0	0
cel_circ_4121	IV	5976252	5976745	+	unc-44	9	4	1	2	0	0
cel_circ_4123	IV	5984568	5984980	+	unc-44	1	0	2	1	0	0
cel_circ_4128	IV	6101422	6102976	+	lag-1	0	0	0	1	0	2
cel_circ_4130	IV	6158321	6158862	-	unc-77	2	0	1	0	0	1
cel_circ_4146	IV	6447335	6449338	-	lgc-10	0	3	0	0	0	0
cel_circ_4148	IV	6563768	6564370	+	best-9	0	0	0	1	2	0
cel_circ_4150	IV	6570719	6572336	-	bicd-1	0	0	4	0	0	0
cel_circ_4163	IV	6986305	6986935	-	prkl-1	0	0	0	1	1	1
cel_circ_4168	IV	7190074	7190124	+	C42D4.1	0	0	0	2	1	0
cel_circ_4173	IV	7394588	7396300	+	pitr-1	0	0	0	4	0	0
cel_circ_4177	IV	7437479	7437859	+	unc-82	0	0	5	2	3	1
cel_circ_4191	IV	7591810	7595757	+	tag-80	3	0	4	0	1	0
cel_circ_4197	IV	7595476	7595757	+	tag-80	1	2	5	0	0	1
cel_circ_4198	IV	7595476	7598758	+	tag-80	1	1	3	0	0	0
cel_circ_4204	IV	7621015	7624893	+	tag-80	4	4	4	0	0	1
cel_circ_4205	IV	7624529	7624893	+	tag-80	2	1	0	0	0	0
cel_circ_4210	IV	7677479	7692662	+	itr-1	0	1	0	0	3	0
cel_circ_4215	IV	7727203	7727283	+	C50F7.5	1	1	0	0	4	1
cel_circ_4226	IV	7916084	7916573	+	C49H3.4	2	1	0	1	1	0
cel_circ_4229	IV	8003572	8004119	-	rig-4	1	1	0	0	1	2
cel_circ_4244	IV	8197428	8198630	-	wsp-1	2	2	5	0	0	2
cel_circ_4247	IV	8231523	8231836	-	nhr-66	1	0	2	0	0	1
cel_circ_4248	IV	8235825	8236591	-	nhr-66	0	0	1	2	1	2
cel_circ_4249	IV	8235825	8236602	-	nhr-66	0	1	0	2	0	2
cel_circ_4251	IV	8287824	8287914	-	K07H8.10	0	0	0	0	0	3
cel_circ_4256	IV	8505569	8509401	-	tag-77	0	0	3	0	0	0
cel_circ_4264	IV	8716467	8716825	+	H23L24.2	0	3	0	0	0	0
cel_circ_4275	IV	8857605	8859881	+	alp-1	2	6	4	0	0	1
cel_circ_4279	IV	8956489	8958138	+	tpra-1	1	0	2	0	1	1
cel_circ_4297	IV	9209094	9209576	+	wnk-1	1	4	2	0	2	1
cel_circ_4301	IV	9391010	9393296	+	daf-15	1	0	2	0	0	0
cel_circ_4304	IV	9436710	9438353	+	F59B8.1	2	1	0	0	0	1
cel_circ_4311	IV	9571555	9571949	-	npr-2	2	2	0	0	0	0
cel_circ_4315	IV	9664946	9666869	-	nhr-34	2	0	1	0	0	0
cel_circ_4322	IV	9772754	9772807	+	cav-1	0	0	0	0	1	3
cel_circ_4327	IV	9922936	9924039	-	dur-1	0	2	2	4	11	2
cel_circ_4329	IV	9923248	9924758	-	dur-1	0	0	3	9	3	2
cel_circ_4331	IV	9981243	9981424	-	C47E12.7	0	0	3	0	0	0
cel_circ_4340	IV	10170740	10171744	-	pxf-1	2	0	2	3	4	2
cel_circ_4347	IV	10340110	10340556	-	unc-43	0	3	1	0	0	0
cel_circ_4353	IV	10500446	10501126	-	tax-6	3	1	0	0	2	0
cel_circ_4362	IV	10812900	10814153	+	miz-1	0	0	0	3	1	0
cel_circ_4373	IV	10931630	10931951	-	dnc-1	0	3	5	0	0	0
cel_circ_4377	IV	11042929	11046079	+	kdin-1	1	5	3	0	1	1
cel_circ_4384	IV	11275681	11276616	+	gtl-2	3	1	8	14	29	19
cel_circ_4390	IV	11589220	11589642	-	F40F11.4	0	1	2	0	0	0
cel_circ_4394	IV	11694763	11695569	+	ZK792.7	51	72	92	4	21	7
cel_circ_4395	IV	11694771	11695569	+	ZK792.7	0	1	3	3	0	0
cel_circ_4396	IV	11694871	11695569	+	ZK792.7	2	7	1	0	0	0
cel_circ_4402	IV	11722520	11723085	+	magi-1	10	3	7	4	4	2
cel_circ_4407	IV	11757467	11761064	-	T12A7.2	2	0	3	0	0	0
cel_circ_4409	IV	11786098	11787798	-	H01G02.3	0	2	2	0	0	0
cel_circ_4410	IV	11786098	11789012	-	H01G02.3	3	5	4	0	1	1
cel_circ_4413	IV	11816747	11817019	+	M117.1	0	3	0	0	0	0
cel_circ_4420	IV	11927891	11928036	+	ZK822.4	0	0	0	3	0	0
cel_circ_4431	IV	12159470	12163053	+	eri-12	0	3	0	0	0	0
cel_circ_4434	IV	12353144	12353929	+	best-22	0	1	0	1	3	3
cel_circ_4440	IV	12548130	12549033	+	ZK795.1	1	1	1	0	0	0
cel_circ_4442	IV	12548130	12551499	+	ZK795.1	7	1	6	4	6	1
cel_circ_4443	IV	12550448	12551499	+	ZK795.1	6	9	19	21	22	10
cel_circ_4446	IV	12654495	12654894	+	wdfy-3	22	15	28	12	19	9
cel_circ_4447	IV	12662531	12663122	+	wdfy-3	4	0	0	0	0	0
cel_circ_4448	IV	12667994	12668702	+	wdfy-3	2	3	2	2	1	0
cel_circ_4451	IV	12776126	12777954	+	unc-31	1	2	0	0	0	0
cel_circ_4462	IV	13014614	13015115	+	mbk-2	25	31	36	49	59	28
cel_circ_4463	IV	13014614	13024618	+	mbk-2	3	3	4	0	3	1
cel_circ_4464	IV	13023834	13024618	+	mbk-2	3	6	9	1	1	2
cel_circ_4466	IV	13031594	13033930	+	mbk-2	0	1	2	0	0	0
cel_circ_4476	IV	13236140	13236585	-	JC8.2	0	0	0	0	0	3
cel_circ_4480	IV	13262110	13272514	-	unc-26	0	0	0	0	2	1
cel_circ_4484	IV	13365831	13366736	+	srsx-25	2	1	1	8	5	0
cel_circ_4492	IV	13439702	13440502	-	mam-3	0	0	3	0	0	0
cel_circ_4495	IV	13485527	13486992	-	tbc-9	0	1	1	6	1	2
cel_circ_4498	IV	13497766	13499314	-	tbc-9	1	0	3	0	2	3
cel_circ_4510	IV	13572612	13572979	+	qui-1	0	0	1	0	2	1
cel_circ_4512	IV	13702618	13703156	-	tlp-1	1	2	0	5	8	3
cel_circ_4522	IV	14216882	14217504	+	F02H6.4	0	1	6	1	0	0
cel_circ_4525	IV	14304521	14305487	+	Y64G10A.7	1	2	0	3	0	0
cel_circ_4529	IV	14671196	14671861	+	anoh-2	4	1	2	0	0	0
cel_circ_4534	IV	14955511	14956692	-	Y41E3.1	4	2	1	1	4	0
cel_circ_4538	IV	15022066	15022492	+	Y41E3.7	7	4	8	4	1	3
cel_circ_4540	IV	15025712	15028371	+	fcd-2	1	0	2	0	0	2
cel_circ_4544	IV	15461285	15467678	-	ntl-11	6	4	2	2	8	5
cel_circ_4546	IV	15461285	15467732	-	ntl-11	6	3	2	1	1	4
cel_circ_4551	IV	15516538	15518787	-	Y73F8A.32	4	1	0	0	1	0
cel_circ_4553	IV	15703360	15705538	+	Y105C5A.15	3	1	0	0	1	0
cel_circ_4557	IV	15718120	15719529	+	Y105C5A.15	0	0	0	0	5	0
cel_circ_4558	IV	15931444	15931960	-	srv-16	0	0	4	0	1	0
cel_circ_4563	IV	16170073	16170621	-	gln-3	2	2	2	1	3	10
cel_circ_4569	IV	16647300	16647564	-	set-26	3	2	6	1	6	4
cel_circ_4572	IV	16666869	16667515	+	sta-1	2	0	0	0	1	2
cel_circ_4573	IV	16850157	16852472	-	map-2	1	1	5	3	2	0
cel_circ_4574	IV	16851533	16854921	-	map-2	0	0	0	0	0	3
cel_circ_4576	IV	16862392	16862831	-	mel-46	5	1	4	2	4	5
cel_circ_4580	IV	16944084	16944254	-	Y116A8C.9	0	0	3	0	0	0
cel_circ_4582	IV	16951385	16952729	+	Y116A8C.13	1	0	2	0	0	0
cel_circ_4587	IV	17076774	17078099	-	Y116A8C.25	1	0	0	0	3	1
cel_circ_4588	IV	17098592	17099454	-	bca-2	7	10	15	17	24	8
cel_circ_4593	IV	17106972	17108034	-	sfa-1	2	2	0	0	0	0
cel_circ_4605	MtDNA	1236	1558	+	MTCE.7	0	0	0	3	0	2
cel_circ_4606	MtDNA	1472	1555	+	MTCE.7	0	0	0	3	0	0
cel_circ_4618	V	20825	21090	+	egl-8	0	2	1	0	0	0
cel_circ_4622	V	28382	29515	+	egl-8	1	2	1	0	0	0
cel_circ_4626	V	70791	79506	-	daam-1	0	3	0	0	0	0
cel_circ_4647	V	310115	310389	-	phf-10	2	2	2	1	4	3
cel_circ_4654	V	777458	777817	+	R09E12.9	0	3	6	0	1	0
cel_circ_4658	V	944713	944791	-	Y50D4C.3	1	1	1	0	0	0
cel_circ_4661	V	954536	955015	-	sqv-6	4	7	6	3	4	1
cel_circ_4663	V	958605	959016	-	sqv-6	11	15	21	12	18	12
cel_circ_4670	V	1122045	1123731	+	W07B8.3	0	0	3	0	0	0
cel_circ_4677	V	1176724	1177270	+	T21H3.1	0	0	0	1	3	6
cel_circ_4678	V	1188335	1193104	-	Y50D4A.4	0	3	2	0	3	3
cel_circ_4692	V	1394615	1397235	-	snt-5	0	0	2	2	5	4
cel_circ_4699	V	1482044	1483189	+	C38C3.4	0	2	4	9	14	6
cel_circ_4709	V	1819941	1820415	-	gly-7	2	2	5	2	2	2
cel_circ_4712	V	1855462	1856274	-	T10B5.10	0	5	0	2	0	3
cel_circ_4713	V	1929422	1930030	+	T06A1.5	0	0	0	1	2	0
cel_circ_4714	V	1944955	1945500	+	glb-25	1	0	2	0	2	0
cel_circ_4715	V	1944955	1951849	+	glb-25	1	0	2	0	0	0
cel_circ_4729	V	2222065	2222927	+	nhr-128	18	10	14	5	17	9
cel_circ_4731	V	2222073	2222927	+	nhr-128	10	19	15	11	23	0
cel_circ_4734	V	2289379	2290566	+	nhr-115	0	0	0	2	3	0
cel_circ_4738	V	2642702	2643080	+	W02H5.2	3	0	1	0	0	1
cel_circ_4741	V	2685723	2687035	+	kel-8	13	11	11	8	6	5
cel_circ_4746	V	2783366	2784718	-	ketn-1	1	2	0	0	0	0
cel_circ_4761	V	3751726	3752293	-	Y39H10A.6	2	1	0	3	0	1
cel_circ_4763	V	3751726	3755797	-	Y39H10A.6	0	0	5	0	0	0
cel_circ_4766	V	3754756	3755471	-	Y39H10A.6	2	0	4	0	1	0
cel_circ_4767	V	3755341	3755797	-	Y39H10A.6	0	0	0	3	1	0
cel_circ_4768	V	3816633	3817600	-	H10D18.5	2	3	3	0	2	1
cel_circ_4770	V	3816633	3820194	-	H10D18.5	7	10	5	0	3	0
cel_circ_4772	V	3818516	3820194	-	H10D18.5	8	7	5	1	2	5
cel_circ_4786	V	4204723	4205710	+	H43I07.1	3	0	3	0	4	3
cel_circ_4791	V	4355346	4356154	-	F32D1.3	5	11	11	8	1	5
cel_circ_4792	V	4355346	4358307	-	F32D1.3	2	8	4	1	5	0
cel_circ_4796	V	4452787	4453250	-	gnrr-5	0	0	4	0	0	0
cel_circ_4797	V	4497463	4505905	+	unc-62	0	0	4	0	0	0
cel_circ_4803	V	4503963	4505905	+	unc-62	3	3	2	7	5	2
cel_circ_4805	V	4505829	4510893	+	unc-62	6	6	3	2	1	2
cel_circ_4809	V	4521760	4522591	-	sos-1	2	3	5	5	6	5
cel_circ_4815	V	4571729	4572388	+	Y61A9LA.3	235	175	189	111	147	97
cel_circ_4819	V	4576275	4576607	+	Y61A9LA.3	0	0	0	0	3	2
cel_circ_4825	V	4825071	4826344	-	hsp-6	0	3	0	0	0	0
cel_circ_4832	V	5091557	5091804	-	not_annotated	2	0	1	0	0	1
cel_circ_4856	V	6011101	6011352	+	fos-1	1	2	0	0	0	2
cel_circ_4867	V	6176579	6177046	-	ttn-1	1	0	1	6	5	3
cel_circ_4887	V	6428046	6429914	-	alh-4	0	2	1	0	2	0
cel_circ_4888	V	6471882	6472995	+	unc-83	1	0	0	2	0	1
cel_circ_4900	V	6680942	6681573	-	egl-46	0	3	0	0	0	0
cel_circ_4908	V	6907608	6910302	-	unc-68	5	1	0	0	0	0
cel_circ_4911	V	6908834	6910302	-	unc-68	14	21	24	1	2	4
cel_circ_4932	V	7770696	7771930	+	frpr-3	3	0	1	0	1	0
cel_circ_4933	V	7771267	7771930	+	frpr-3	3	1	1	0	0	0
cel_circ_4946	V	8109788	8110516	+	myo-5	0	0	4	3	7	1
cel_circ_4952	V	8193111	8194540	-	F20D6.10	0	1	0	1	1	1
cel_circ_4956	V	8422055	8422736	-	lmd-3	0	3	1	0	2	2
cel_circ_4969	V	8800155	8801022	-	C01B7.5	4	0	8	2	0	0
cel_circ_4974	V	8937403	8939318	+	unc-23	0	0	0	0	0	4
cel_circ_4980	V	9130366	9131478	+	F21C10.3	1	4	0	0	0	0
cel_circ_4988	V	9339312	9339446	-	not_annotated	1	0	3	1	0	0
cel_circ_4996	V	9391871	9396955	+	hum-2	1	3	0	0	2	0
cel_circ_4997	V	9397716	9397795	-	not_annotated	6	0	2	0	0	0
cel_circ_4999	V	9446303	9449688	+	H24G06.1	2	1	2	6	33	9
cel_circ_5002	V	9457845	9459475	+	H24G06.1	2	1	2	0	2	0
cel_circ_5004	V	9472292	9472351	+	flp-6	0	0	4	0	0	0
cel_circ_5007	V	9472598	9472693	+	flp-6	1	0	3	0	0	0
cel_circ_5010	V	9558885	9560007	-	rgef-1	3	2	7	1	0	0
cel_circ_5012	V	9578036	9578848	+	F25B3.2	2	3	4	13	13	2
cel_circ_5013	V	9610495	9611364	+	dop-2	0	0	4	0	0	0
cel_circ_5017	V	9732515	9733244	+	drap-1	2	0	1	0	0	0
cel_circ_5018	V	9732515	9733429	+	drap-1	11	7	3	0	0	4
cel_circ_5020	V	9737469	9738435	+	aqp-4	5	0	1	0	0	0
cel_circ_5033	V	9858476	9859963	-	lsy-12	1	2	5	2	0	0
cel_circ_5034	V	9905381	9905809	+	egl-47	1	3	6	0	1	3
cel_circ_5039	V	10044295	10045718	+	F57A8.1	1	2	0	0	1	0
cel_circ_5045	V	10248907	10250676	+	akt-1	15	16	23	4	6	6
cel_circ_5053	V	10331079	10332112	-	crm-1	0	0	1	1	5	2
cel_circ_5055	V	10468517	10471116	+	egl-9	4	0	10	2	4	2
cel_circ_5066	V	10845645	10846411	+	nrx-1	1	1	2	0	1	0
cel_circ_5072	V	10860802	10865432	-	saeg-1	1	2	0	0	0	0
cel_circ_5085	V	11147538	11147597	+	nlp-33	0	0	0	1	2	1
cel_circ_5087	V	11175938	11176723	-	gpa-1	114	85	89	19	53	21
cel_circ_5095	V	11536056	11536696	+	ccch-1	11	18	16	28	49	15
cel_circ_5105	V	11632712	11635372	-	sipa-1	2	1	0	0	0	1
cel_circ_5109	V	11712502	11715903	-	tre-3	0	0	3	0	0	0
cel_circ_5113	V	11835958	11839385	-	nphp-4	0	0	3	0	0	0
cel_circ_5119	V	11920157	11920959	+	R31.2	3	1	2	3	3	0
cel_circ_5120	V	11925611	11926830	-	osm-6	1	2	1	1	0	1
cel_circ_5124	V	12016865	12017793	-	pkc-1	0	3	0	1	0	0
cel_circ_5127	V	12023603	12024160	-	pkc-1	3	0	0	1	0	0
cel_circ_5128	V	12035527	12035985	-	kup-1	1	2	1	0	1	0
cel_circ_5129	V	12035527	12037141	-	kup-1	1	0	5	0	1	0
cel_circ_5136	V	12222141	12222679	+	vab-8	2	1	2	4	1	2
cel_circ_5138	V	12227314	12227367	-	myo-3	0	0	0	2	8	1
cel_circ_5145	V	12469349	12470970	+	F28C1.3	1	1	2	1	0	0
cel_circ_5147	V	12499254	12499768	+	W04D2.6	0	0	0	1	2	0
cel_circ_5151	V	12697858	12700100	+	istr-1	2	4	5	0	1	0
cel_circ_5163	V	12912839	12914135	+	nid-1	1	7	4	2	1	0
cel_circ_5165	V	12912839	12915689	+	nid-1	4	4	7	9	8	3
cel_circ_5174	V	13054652	13055620	-	not_annotated	0	0	3	0	0	0
cel_circ_5175	V	13069423	13070284	-	C34B4.3	2	7	2	4	1	1
cel_circ_5184	V	13162315	13164468	+	noca-1	4	6	9	10	10	4
cel_circ_5185	V	13162315	13167724	+	noca-1	3	1	4	2	2	3
cel_circ_5188	V	13236176	13237083	-	dmd-11	0	5	0	0	0	2
cel_circ_5193	V	13282878	13284005	-	uig-1	15	29	37	39	86	53
cel_circ_5194	V	13352224	13352850	+	twk-43	0	3	0	0	3	0
cel_circ_5199	V	13447097	13448804	+	Y2H9A.4	0	2	0	1	4	0
cel_circ_5202	V	13523504	13524310	+	R11G10.3	1	0	2	0	1	0
cel_circ_5213	V	13673336	13673626	+	F58G11.4	0	0	0	0	2	2
cel_circ_5214	V	13689892	13692342	+	T01D3.1	0	9	4	1	0	0
cel_circ_5217	V	13705499	13705898	+	T01D3.3	0	1	1	0	2	2
cel_circ_5223	V	13797483	13800545	+	twk-32	0	1	1	0	3	1
cel_circ_5224	V	13799380	13800545	+	twk-32	1	0	2	0	0	0
cel_circ_5226	V	13902199	13902531	-	not_annotated	1	0	2	0	0	0
cel_circ_5227	V	13908501	13908544	-	C06B3.6	0	0	0	0	3	0
cel_circ_5230	V	13995104	14000860	-	ric-7	3	3	8	0	3	1
cel_circ_5235	V	14011691	14011744	-	ddx-17	1	1	4	0	2	1
cel_circ_5239	V	14114476	14121018	-	par-1	1	1	1	0	0	0
cel_circ_5240	V	14115458	14116680	-	par-1	4	4	4	4	7	2
cel_circ_5241	V	14115458	14117770	-	par-1	3	5	4	0	3	0
cel_circ_5242	V	14116447	14117770	-	par-1	2	1	0	1	1	1
cel_circ_5245	V	14117503	14121018	-	par-1	1	0	2	0	0	0
cel_circ_5255	V	14226063	14226467	-	K02E11.11	0	0	2	0	1	3
cel_circ_5257	V	14349024	14349524	+	cept-2	1	1	1	0	0	0
cel_circ_5269	V	14687846	14687914	+	daf-21	2	1	2	3	2	3
cel_circ_5273	V	14795926	14804826	-	rin-1	0	1	2	0	2	1
cel_circ_5282	V	14833635	14834572	-	ret-1	0	0	1	1	5	1
cel_circ_5284	V	14856990	14857944	-	npr-13	1	0	4	0	0	0
cel_circ_5289	V	15001743	15001799	-	fib-1	0	0	0	2	1	3
cel_circ_5292	V	15071876	15074886	+	unc-76	0	0	3	0	2	0
cel_circ_5293	V	15426868	15432720	-	T26H5.8	1	0	2	1	0	4
cel_circ_5305	V	16408749	16409542	+	F26D2.3	0	0	3	2	0	0
cel_circ_5310	V	16756744	16759245	+	dkf-2	4	1	0	0	0	0
cel_circ_5323	V	17727504	17728204	-	twk-42	0	0	1	0	1	3
cel_circ_5328	V	17783410	17783640	-	srab-12	18	16	18	4	5	3
cel_circ_5329	V	17797002	17797595	-	srx-18	2	1	3	0	1	1
cel_circ_5331	V	17868605	17870651	-	csn-1	0	0	0	0	3	0
cel_circ_5332	V	17879722	17880180	+	phf-14	5	5	6	2	2	4
cel_circ_5333	V	17920644	17921054	+	C06H5.8	0	0	4	1	4	1
cel_circ_5337	V	17943129	17946540	-	dpy-21	2	2	6	4	6	3
cel_circ_5346	V	18025396	18036309	+	prp-6	1	0	0	0	0	3
cel_circ_5347	V	18028943	18029327	+	prp-6	0	0	0	3	0	0
cel_circ_5350	V	18065097	18065498	-	Y59A8B.8	0	0	5	1	2	4
cel_circ_5354	V	18073196	18073648	-	Y59A8B.10	0	3	3	2	2	2
cel_circ_5357	V	18075368	18075693	-	Y59A8B.10	1	2	1	0	0	0
cel_circ_5358	V	18075368	18077460	-	Y59A8B.10	1	0	1	0	0	3
cel_circ_5360	V	18090259	18091558	+	slr-2	0	2	1	0	0	0
cel_circ_5361	V	18090259	18094404	+	slr-2	3	0	2	1	0	1
cel_circ_5365	V	18098676	18101964	-	not_annotated	3	0	0	0	0	0
cel_circ_5376	V	18177618	18178236	-	C31G12.4	0	0	0	2	1	0
cel_circ_5378	V	18354685	18355934	-	C08E8.2	0	0	0	2	1	0
cel_circ_5381	V	18410748	18411215	-	ZK262.2	2	0	2	6	4	4
cel_circ_5383	V	18458900	18460719	-	ZK228.3	0	0	0	1	2	2
cel_circ_5390	V	18498535	18498843	+	slo-1	1	1	4	0	2	0
cel_circ_5395	V	18540397	18543093	+	Y51A2D.7	0	1	0	1	1	2
cel_circ_5396	V	18541604	18541811	+	Y51A2D.7	1	2	0	1	1	4
cel_circ_5397	V	18541604	18543093	+	Y51A2D.7	1	0	0	0	2	1
cel_circ_5401	V	18564018	18564886	-	srg-34	4	3	9	1	3	0
cel_circ_5403	V	18571835	18572275	+	Y51A2D.21	0	0	0	0	3	0
cel_circ_5407	V	18603470	18603918	+	grdn-1	13	5	5	5	4	0
cel_circ_5409	V	18609307	18610375	+	grdn-1	14	4	8	2	6	2
cel_circ_5410	V	18624238	18624611	-	Y69H2.15	0	0	0	1	2	1
cel_circ_5416	V	18646356	18646814	+	egas-1	5	10	13	5	4	8
cel_circ_5418	V	18658354	18658671	-	Y69H2.3	0	0	2	0	2	1
cel_circ_5422	V	18687024	18687773	-	ubc-19	4	4	4	0	3	2
cel_circ_5423	V	18687024	18688504	-	ubc-19	2	4	2	1	2	0
cel_circ_5424	V	18688263	18688504	-	ubc-19	26	24	28	8	17	8
cel_circ_5426	V	18691470	18691788	+	Y69H2.7	4	0	0	0	0	0
cel_circ_5427	V	18693342	18693541	+	Y69H2.7	0	0	1	3	2	0
cel_circ_5428	V	18717433	18717885	-	Y17D7C.2	5	0	1	0	0	0
cel_circ_5434	V	18805957	18806516	-	sri-10	3	2	1	0	0	0
cel_circ_5438	V	18841199	18841813	+	nhr-65	1	3	3	3	9	1
cel_circ_5441	V	18848247	18848669	+	nhr-230	0	8	0	0	0	0
cel_circ_5443	V	18856082	18856567	-	wars-1	3	1	2	0	3	2
cel_circ_5447	V	18884423	18893757	-	emb-4	0	2	1	0	0	0
cel_circ_5449	V	18889773	18893757	-	emb-4	0	1	1	1	2	0
cel_circ_5453	V	18956130	18956410	-	Y80D3A.9	3	3	8	5	12	6
cel_circ_5454	V	18956130	18956459	-	Y80D3A.9	0	0	0	2	1	1
cel_circ_5457	V	18959404	18959844	-	ztf-20	0	3	4	1	7	1
cel_circ_5459	V	18990852	18991405	+	Y39B6A.37	1	1	2	1	0	0
cel_circ_5468	V	19078098	19078974	-	nhr-95	0	2	1	0	0	0
cel_circ_5470	V	19080477	19080865	-	nhr-95	0	2	3	2	1	1
cel_circ_5471	V	19091304	19092137	+	nhr-145	3	0	0	0	0	0
cel_circ_5472	V	19091676	19092137	+	nhr-145	0	0	3	0	0	0
cel_circ_5474	V	19121803	19122246	-	bed-1	6	4	1	1	4	3
cel_circ_5480	V	19264454	19264767	+	F21D9.1	3	2	1	0	0	0
cel_circ_5482	V	19293649	19294120	-	F55C9.6	2	0	2	2	0	1
cel_circ_5487	V	19348585	19349493	-	C14B4.2	0	0	3	2	1	1
cel_circ_5491	V	19397257	19398458	-	C25F9.13	4	2	2	0	1	0
cel_circ_5496	V	19520954	19521846	-	Y43F8B.2	1	2	2	0	0	0
cel_circ_5498	V	19531466	19531987	-	Y43F8B.2	6	5	7	1	1	0
cel_circ_5502	V	19585283	19585723	+	kcnl-1	4	4	8	2	2	0
cel_circ_5507	V	19603804	19604563	+	kcnl-1	1	2	0	0	0	0
cel_circ_5508	V	19619247	19620948	-	Y43F8C.3	1	0	1	1	2	0
cel_circ_5512	V	19674845	19676235	+	mrp-7	2	1	2	1	2	4
cel_circ_5515	V	19695196	19695723	-	Y43F8C.13	0	1	0	0	4	0
cel_circ_5517	V	19828028	19829294	-	pcp-4	0	0	0	0	3	0
cel_circ_5518	V	19828814	19829294	-	pcp-4	1	2	4	2	4	1
cel_circ_5522	V	19888337	19888655	-	gly-4	1	0	2	0	0	1
cel_circ_5523	V	19892170	19892667	-	gly-4	20	20	34	8	11	7
cel_circ_5526	V	19902142	19907434	-	fars-2	0	1	2	1	0	0
cel_circ_5528	V	19905104	19907373	-	fars-2	1	0	2	0	0	1
cel_circ_5529	V	19905104	19907434	-	fars-2	8	7	5	3	13	4
cel_circ_5530	V	19905983	19906479	-	fars-2	0	1	3	0	0	0
cel_circ_5531	V	19905983	19906483	-	fars-2	2	5	4	2	7	4
cel_circ_5532	V	19906327	19907434	-	fars-2	6	6	5	5	3	5
cel_circ_5533	V	19916557	19916903	+	Y60A3A.19	5	5	8	1	4	3
cel_circ_5545	V	20090165	20090743	-	dcs-1	4	3	4	0	1	0
cel_circ_5547	V	20100114	20101257	+	sec-23	0	2	1	4	0	0
cel_circ_5549	V	20103207	20103433	+	sec-23	4	1	3	2	4	2
cel_circ_5550	V	20108305	20111501	-	ncx-1	0	0	0	1	2	0
cel_circ_5551	V	20109280	20110710	-	ncx-1	0	2	1	0	2	0
cel_circ_5558	V	20241260	20246132	-	swsn-1	1	1	0	0	3	0
cel_circ_5559	V	20241260	20247749	-	swsn-1	1	3	0	2	2	0
cel_circ_5562	V	20244238	20246132	-	swsn-1	3	4	2	2	2	2
cel_circ_5565	V	20271854	20272889	+	cdkr-3	0	0	0	2	0	1
cel_circ_5566	V	20278748	20278870	-	pqn-94	0	0	0	1	2	0
cel_circ_5567	V	20282820	20283140	-	mlt-4	0	0	1	5	1	4
cel_circ_5568	V	20284265	20284563	-	mlt-4	0	0	0	0	3	0
cel_circ_5569	V	20284265	20288415	-	mlt-4	0	0	0	0	6	1
cel_circ_5572	V	20398650	20398858	-	F53H2.3	0	3	1	0	0	0
cel_circ_5576	V	20404523	20408352	-	F53H2.3	1	1	0	1	1	5
cel_circ_5578	V	20405761	20408352	-	F53H2.3	0	2	2	1	0	0
cel_circ_5580	V	20460946	20464492	-	B0250.4	3	1	1	1	0	0
cel_circ_5581	V	20462681	20464492	-	B0250.4	1	0	3	0	0	0
cel_circ_5594	V	20737371	20737702	-	dnj-25	3	0	0	0	0	0
cel_circ_5595	V	20737371	20739850	-	dnj-25	1	0	0	2	2	0
cel_circ_5600	V	20783046	20783116	+	hif-1	1	2	0	0	0	0
cel_circ_5607	V	20890252	20893620	+	unc-80	3	2	2	0	0	0
cel_circ_5622	X	328178	330140	+	M02E1.1	3	4	7	1	3	0
cel_circ_5626	X	344166	345275	-	C04E7.3	50	56	77	49	54	34
cel_circ_5630	X	428540	429505	-	dve-1	0	0	0	1	3	0
cel_circ_5635	X	484532	485308	+	che-2	0	0	3	0	0	0
cel_circ_5637	X	558843	559103	+	nas-38	0	0	0	1	2	5
cel_circ_5647	X	695262	697440	+	ncam-1	3	2	7	0	2	0
cel_circ_5657	X	724095	725267	-	sli-1	2	0	0	0	9	4
cel_circ_5661	X	732525	735486	-	npr-19	5	9	13	0	0	0
cel_circ_5667	X	822853	824169	-	daf-3	1	4	0	2	0	0
cel_circ_5673	X	925368	926303	+	tbc-11	5	7	2	1	8	1
cel_circ_5681	X	987240	987848	-	dgk-1	1	1	1	0	0	0
cel_circ_5690	X	1167925	1168461	+	tmc-1	3	0	0	1	0	1
cel_circ_5693	X	1170928	1172011	+	tmc-1	1	1	1	0	1	0
cel_circ_5722	X	2265447	2265840	-	AH9.6	1	0	2	0	0	0
cel_circ_5730	X	2360673	2364295	+	lgc-40	2	0	2	0	0	0
cel_circ_5731	X	2360673	2364316	+	lgc-40	0	0	3	1	0	0
cel_circ_5735	X	2431247	2431780	-	T07D1.2	2	3	7	1	5	2
cel_circ_5736	X	2431247	2433779	-	T07D1.2	1	2	0	0	0	0
cel_circ_5743	X	2567602	2568191	-	F52H2.7	0	2	0	1	0	2
cel_circ_5745	X	2601750	2602929	+	nhr-40	5	3	4	1	0	0
cel_circ_5746	X	2604381	2605132	+	nhr-40	1	0	3	1	1	0
cel_circ_5754	X	2648344	2650286	-	F54G2.1	1	2	0	0	0	0
cel_circ_5761	X	2714634	2722699	-	unc-2	4	1	4	0	0	2
cel_circ_5763	X	2715092	2722699	-	unc-2	0	0	4	0	0	0
cel_circ_5776	X	2933361	2935764	+	fard-1	0	0	0	1	1	1
cel_circ_5779	X	2977798	2979403	+	aakg-3	1	1	1	1	2	1
cel_circ_5780	X	2978773	2979403	+	aakg-3	3	0	1	0	0	0
cel_circ_5791	X	3171815	3172190	-	klp-4	3	0	0	0	0	0
cel_circ_5796	X	3338088	3341382	+	F11D5.1	2	0	0	2	3	1
cel_circ_5797	X	3339698	3341382	+	F11D5.1	0	0	0	4	11	0
cel_circ_5812	X	3699365	3700762	+	C02F12.9	6	11	5	3	8	2
cel_circ_5813	X	3700324	3700762	+	C02F12.9	7	6	10	4	3	1
cel_circ_5814	X	3709272	3709794	+	C01C4.3	0	0	0	2	2	0
cel_circ_5815	X	3709272	3711018	+	C01C4.3	1	1	1	1	0	2
cel_circ_5817	X	3801365	3802769	-	erp-1	1	2	0	1	0	0
cel_circ_5819	X	3812072	3812317	+	F35A5.1	0	1	3	1	3	3
cel_circ_5822	X	3819492	3820570	-	fkh-9	2	1	1	1	2	0
cel_circ_5826	X	3888487	3888743	+	F47F2.1	0	2	1	0	0	0
cel_circ_5834	X	4152543	4153443	-	nck-1	0	0	2	0	1	2
cel_circ_5840	X	4328550	4328916	-	C24A8.5	0	2	1	1	1	1
cel_circ_5852	X	4478110	4478590	-	ncr-1	0	0	0	0	0	3
cel_circ_5858	X	4617533	4619178	-	pqn-65	3	1	0	0	3	0
cel_circ_5867	X	4855152	4857531	-	add-1	1	2	0	0	1	0
cel_circ_5885	X	5140926	5142464	+	tbc-7	1	0	0	3	6	0
cel_circ_5888	X	5214323	5215560	+	H28G03.2	0	0	1	1	3	1
cel_circ_5893	X	5291681	5293736	-	ags-3	3	5	0	0	0	0
cel_circ_5898	X	5388401	5393239	+	kcnl-3	0	0	0	0	4	0
cel_circ_5902	X	5480745	5480777	+	dlg-1	0	0	0	0	0	4
cel_circ_5906	X	5678726	5680225	-	set-19	7	0	7	0	4	0
cel_circ_5908	X	5722261	5724306	-	rgs-6	0	2	1	0	0	0
cel_circ_5916	X	5862721	5864632	+	ctbp-1	36	28	38	15	12	8
cel_circ_5920	X	5965608	5965963	+	R07E4.1	2	2	0	0	1	1
cel_circ_5927	X	6211817	6212449	-	C14F11.2	2	0	2	0	0	0
cel_circ_5928	X	6234070	6234936	-	hsp-43	1	0	0	5	6	0
cel_circ_5943	X	6638891	6639500	-	nhr-120	0	0	0	0	5	0
cel_circ_5952	X	6947778	6948698	-	inx-1	1	2	2	2	0	0
cel_circ_5954	X	6973225	6974847	+	F01E11.3	1	1	1	1	0	0
cel_circ_5961	X	7220973	7221791	+	syd-9	4	12	14	4	3	0
cel_circ_5962	X	7223871	7224212	+	syd-9	5	0	3	0	2	1
cel_circ_5965	X	7277304	7277747	-	unc-10	2	1	2	0	0	0
cel_circ_5971	X	7528670	7528712	-	ceh-14	0	3	0	0	0	0
cel_circ_5975	X	7753993	7755251	+	C47C12.2	0	1	3	0	0	0
cel_circ_5984	X	8020564	8021381	+	C34D10.2	2	0	0	2	1	0
cel_circ_5986	X	8021189	8023262	+	C34D10.2	5	8	3	2	3	4
cel_circ_6000	X	8275169	8276255	+	ksr-1	10	6	24	1	13	7
cel_circ_6005	X	8432663	8433476	+	kin-9	0	0	0	1	3	0
cel_circ_6015	X	8587288	8587918	+	F18E9.3	0	0	0	0	2	1
cel_circ_6019	X	8662926	8666208	+	rig-1	0	0	0	2	0	1
cel_circ_6021	X	8701097	8702192	+	frpr-8	1	0	0	2	1	0
cel_circ_6024	X	8781316	8782280	+	ZK721.4	0	3	6	0	1	0
cel_circ_6036	X	9103636	9107374	+	ajm-1	1	0	0	0	3	0
cel_circ_6040	X	9109918	9110682	+	ajm-1	1	0	0	1	5	1
cel_circ_6045	X	9239949	9241422	-	lgc-4	2	5	3	2	3	1
cel_circ_6051	X	9365036	9365993	+	pkc-2	1	5	1	0	0	0
cel_circ_6052	X	9365036	9371195	+	pkc-2	1	6	1	1	1	0
cel_circ_6054	X	9380052	9383091	+	pkc-2	5	10	7	1	1	0
cel_circ_6062	X	9420710	9422225	+	fln-2	2	0	0	3	7	2
cel_circ_6066	X	9496541	9498202	+	gap-2	25	15	35	40	57	21
cel_circ_6067	X	9496541	9503013	+	gap-2	1	0	3	0	1	0
cel_circ_6068	X	9496541	9504031	+	gap-2	6	10	9	20	24	13
cel_circ_6069	X	9496541	9511162	+	gap-2	0	1	4	3	6	1
cel_circ_6070	X	9502841	9504031	+	gap-2	0	1	0	2	2	0
cel_circ_6071	X	9510525	9511162	+	gap-2	4	9	3	11	12	5
cel_circ_6074	X	9553451	9554158	+	F49E2.5	0	0	0	1	1	1
cel_circ_6092	X	9747151	9751539	+	him-4	0	0	3	3	0	0
cel_circ_6097	X	9864818	9865264	+	R07B1.5	0	3	0	0	0	0
cel_circ_6101	X	9934898	9935330	+	tsp-21	2	3	1	0	0	1
cel_circ_6102	X	9947320	9948143	-	nas-37	0	0	5	0	0	0
cel_circ_6103	X	9947820	9948143	-	nas-37	4	0	0	0	0	0
cel_circ_6119	X	10186372	10187958	-	F21A10.2	0	0	3	1	0	1
cel_circ_6136	X	10505902	10512413	+	vab-3	0	0	4	2	0	0
cel_circ_6138	X	10509453	10512413	+	vab-3	3	2	6	0	2	2
cel_circ_6140	X	10510977	10512413	+	vab-3	9	10	4	1	2	0
cel_circ_6143	X	10516371	10518009	+	vab-3	1	8	6	6	7	7
cel_circ_6144	X	10517424	10518009	+	vab-3	1	4	1	0	1	0
cel_circ_6146	X	10571708	10574319	+	bet-2	0	0	0	1	2	0
cel_circ_6156	X	10650898	10651553	+	daf-12	1	2	0	0	0	0
cel_circ_6161	X	10720604	10721394	-	mbr-1	3	0	2	0	0	0
cel_circ_6163	X	10774893	10775605	+	sma-9	0	3	1	0	0	2
cel_circ_6164	X	10774893	10778540	+	sma-9	4	1	2	0	1	0
cel_circ_6165	X	10775830	10778540	+	sma-9	84	82	87	18	23	12
cel_circ_6166	X	10775830	10778863	+	sma-9	3	1	2	0	2	0
cel_circ_6171	X	10796510	10797548	-	plc-1	3	7	10	0	3	2
cel_circ_6173	X	10796510	10800840	-	plc-1	1	0	5	0	0	0
cel_circ_6174	X	10796510	10801733	-	plc-1	0	0	0	0	2	1
cel_circ_6179	X	10800152	10800840	-	plc-1	19	23	19	9	9	5
cel_circ_6184	X	10814048	10815004	-	plc-1	6	2	5	3	4	0
cel_circ_6189	X	10923291	10923519	-	dgn-1	0	0	3	0	0	0
cel_circ_6204	X	11446066	11446633	-	igeg-2	1	6	0	0	0	0
cel_circ_6205	X	11468486	11469606	+	lin-14	1	1	1	0	0	0
cel_circ_6207	X	11480781	11481639	+	lin-14	3	0	1	0	0	0
cel_circ_6208	X	11480781	11482623	+	lin-14	4	2	0	0	0	0
cel_circ_6216	X	11605071	11605114	-	ftt-2	3	1	1	0	0	0
cel_circ_6221	X	11829296	11834125	+	tag-241	8	3	5	2	1	0
cel_circ_6228	X	12048641	12049345	-	B0198.3	2	0	3	0	0	0
cel_circ_6232	X	12201201	12201750	-	cab-1	2	3	3	0	2	0
cel_circ_6235	X	12203084	12203542	-	cab-1	0	3	2	0	0	0
cel_circ_6236	X	12203084	12205632	-	cab-1	6	6	5	1	2	2
cel_circ_6240	X	12437459	12438030	+	T18D3.7	4	4	13	1	2	1
cel_circ_6251	X	12505607	12506966	-	scd-1	5	1	1	0	0	1
cel_circ_6253	X	12505819	12509219	-	scd-1	1	5	0	0	0	0
cel_circ_6264	X	12686450	12687762	+	adt-1	0	5	0	0	0	0
cel_circ_6276	X	13064194	13066390	+	K03A11.5	0	2	6	0	7	2
cel_circ_6277	X	13064194	13066476	+	K03A11.5	2	2	3	2	12	1
cel_circ_6300	X	13876517	13877582	-	T21H8.5	0	2	0	2	1	1
cel_circ_6310	X	14033801	14035869	+	arrd-25	0	1	0	2	4	4
cel_circ_6312	X	14056760	14057242	+	dyc-1	1	0	0	1	2	1
cel_circ_6313	X	14057097	14058476	+	dyc-1	0	0	3	0	0	0
cel_circ_6321	X	14147700	14151103	+	akt-2	0	3	0	0	0	0
cel_circ_6326	X	14339463	14340436	-	sel-7	2	0	1	2	4	2
cel_circ_6328	X	14353972	14354790	-	irk-3	2	0	1	0	0	0
cel_circ_6332	X	14490707	14490754	+	his-24	0	0	0	1	0	2
cel_circ_6334	X	14496085	14497054	+	ztf-14	0	0	0	0	3	0
cel_circ_6342	X	14636119	14636421	-	F54E4.3	1	0	2	0	3	0
cel_circ_6353	X	14976117	14976683	+	F20D1.3	1	2	2	0	0	0
cel_circ_6359	X	15124586	15127175	-	unc-7	2	0	2	0	1	0
cel_circ_6367	X	15271227	15272952	-	kin-20	0	4	1	5	4	3
cel_circ_6369	X	15309375	15309842	+	nhr-91	5	5	0	0	0	0
cel_circ_6373	X	15370639	15373055	-	tag-97	1	0	2	0	0	0
cel_circ_6374	X	15372513	15373055	-	tag-97	2	0	3	0	0	1
cel_circ_6375	X	15501491	15502317	-	tbh-1	3	2	1	0	0	0
cel_circ_6378	X	15550421	15551032	-	lron-3	1	1	8	1	6	0
cel_circ_6379	X	15571571	15572340	+	dyn-1	1	6	9	3	2	2
cel_circ_6380	X	15571571	15572595	+	dyn-1	3	2	4	2	2	0
cel_circ_6387	X	15989880	15990446	-	C09G1.4	0	3	0	0	0	0
cel_circ_6389	X	16036802	16039231	-	B0395.3	1	0	1	1	4	1
cel_circ_6390	X	16078144	16078506	-	C30F2.2	2	1	7	3	1	0
cel_circ_6414	X	16652120	16654505	-	C06G1.6	5	2	7	1	2	0
cel_circ_6432	X	16931758	16932039	+	not_annotated	1	2	1	0	1	3
cel_circ_6436	X	16931892	16932044	+	not_annotated	0	1	2	0	0	0
cel_circ_6448	X	16932342	16938162	+	not_annotated	1	4	3	1	0	0
cel_circ_6449	X	16932493	16934302	+	not_annotated	2	0	1	2	0	0
cel_circ_6451	X	16932493	16938162	+	not_annotated	0	0	3	2	0	0
cel_circ_6452	X	16932493	16939823	+	not_annotated	1	1	2	0	0	0
cel_circ_6455	X	16932644	16938162	+	not_annotated	2	4	0	0	0	0
cel_circ_6466	X	16939154	16940210	+	not_annotated	3	0	2	1	0	0
cel_circ_6473	X	16966013	16966701	+	F52G3.1	1	2	2	1	1	0
cel_circ_6478	X	17051803	17051968	-	gcy-11	1	0	1	0	6	3
cel_circ_6479	X	17065124	17066848	-	C30G4.4	0	0	0	2	1	3
cel_circ_6480	X	17065124	17072186	-	C30G4.4	1	2	0	0	0	0
cel_circ_6482	X	17176462	17176933	-	B0302.4	0	3	0	0	0	0
